1 **Kv2.1 mediates spatial and functional coupling of L-type calcium channels and ryanodine receptors**  
2 **in neurons**

3

4 Nicholas C. Vierra<sup>1,2</sup>, Michael Kirmiz<sup>1</sup>, Deborah van der List<sup>1,2</sup>, L. Fernando Santana<sup>2</sup>, and James S.  
5 Trimmer<sup>1,2</sup>

6

7 <sup>1</sup>Department of Neurobiology, Physiology, and Behavior, University of California, Davis, CA 95616;

8 <sup>2</sup>Department of Physiology and Membrane Biology, University of California, Davis, School of Medicine,  
9 Davis, CA 95616

10

11 To whom correspondence should be addressed:

12 Dr. James S. Trimmer, Department of Physiology and Membrane Biology, University of California,  
13 Davis, School of Medicine, Davis, CA 95616. E-mail [jtrimmer@ucdavis.edu](mailto:jtrimmer@ucdavis.edu)

14

15

16

17

18

19

20

21

22

23

24

25

26

27 **Abstract**

28 The voltage-gated K<sup>+</sup> channel Kv2.1 serves a major structural role in the soma and proximal dendrites of  
29 brain neurons, tethering the plasma membrane (PM) to the endoplasmic reticulum (ER). Although Kv2.1  
30 clustering at neuronal ER-PM junctions (EPJs) is tightly regulated and conserved across species, its  
31 function at these sites is unclear. By identifying and evaluating proteins in close spatial proximity to  
32 Kv2.1-containing EPJs, we discovered that a significant role of Kv2.1 at EPJs is to promote the clustering  
33 and functional coupling of PM L-type Ca<sup>2+</sup> channels (LTCCs) to ryanodine receptor (RyR) ER Ca<sup>2+</sup>  
34 release channels. Kv2.1 clustering also unexpectedly enhanced LTCC opening at polarized membrane  
35 potentials. This enabled Kv2.1-LTCC-RyR triads to generate localized Ca<sup>2+</sup> release events (i.e., Ca<sup>2+</sup>  
36 sparks) independently of action potentials. Together, these findings uncover a novel mode of LTCC  
37 regulation and establish a unique mechanism whereby Kv2.1-associated EPJs provide a molecular  
38 platform for localized somatodendritic Ca<sup>2+</sup> signals.

39

## 40 Introduction

41 The members of the Kv2 family of voltage-gated K<sup>+</sup> (Kv) channels, Kv2.1 and Kv2.2, are among  
42 the most abundant and widely expressed K<sup>+</sup> channels in mammalian brain neurons (Trimmer, 2015). Kv2  
43 channels are present in high density clusters [approximately 3.7-fold greater channel density within  
44 clusters than in the adjacent membrane (Fox et al., 2013)] localized to neuronal somata, proximal  
45 dendrites, and axon initial segments (Trimmer, 1991; Du et al., 1998; Bishop et al., 2015; Kirmiz et al.,  
46 2018a). In hippocampal and cortical neurons, Kv2 channels conduct most of the delayed rectifier K<sup>+</sup>  
47 current (Murakoshi and Trimmer, 1999; Du et al., 2000; Guan et al., 2007). Detailed studies have  
48 revealed the significant influence of neuronal Kv2.1-mediated currents on action potential duration and  
49 repetitive firing (Du et al., 2000; Liu and Bean, 2014; Kimm et al., 2015). In addition to its important role  
50 in modulating intrinsic electrical activity, Kv2.1 serves a non-canonical structural (*i.e.*, non-conducting)  
51 function in tethering the plasma membrane (PM) to the endoplasmic reticulum (ER) to form ER-PM  
52 junctions (EPJs) (Fox et al., 2015; Johnson et al., 2018; Kirmiz et al., 2018a; Kirmiz et al., 2018b).  
53 Although Kv2.1 clustering at EPJs is tightly regulated and independent of K<sup>+</sup> conductance (Kirmiz et al.,  
54 2018a), the physiological impact of concentrating this Kv channel at an EPJ is not known.

55 In brain neurons, EPJs occupy approximately 10% of the PM surface area, predominantly within  
56 the soma and proximal dendrites (Wu et al., 2017). By electron microscopy, the ER at many neuronal  
57 EPJs appears as a micron-diameter, flattened vesicle less than 10 nm from the PM, designated a  
58 subsurface cistern (Rosenbluth, 1962; Tao-Cheng, 2018). While the specific functions of neuronal  
59 subsurface cisterns remain unclear, in most eukaryotic cells, EPJs represent domains specialized for  
60 maintenance of Ca<sup>2+</sup>, lipid, and metabolic homeostasis (Gallo et al., 2016; Chang et al., 2017).

61 L-type voltage-gated Ca<sup>2+</sup> channels (LTCCs) are prominently expressed in neurons throughout  
62 the brain (Catterall, 2011; Zamponi et al., 2015). Their important role in brain is underscored by studies  
63 showing genetic variation in the *CACNA1C* gene encoding Cav1.2, the major voltage-sensing and pore  
64 forming  $\alpha 1$  subunit expressed in brain, is associated with neurodevelopmental, psychiatric and  
65 neurological disorders (Splawski et al., 2004; Ferreira et al., 2008; Bozarth et al., 2018). Given their

66 diverse and crucial roles in neuronal function, LTCCs are subjected to multimodal regulation to ensure  
67 their activity is coupled to overall cellular state especially as related to intracellular  $[Ca^{2+}]$  (Lipscombe et  
68 al., 2013; Hofmann et al., 2014; Neely and Hidalgo, 2014). In both neurons and non-neuronal cells,  
69 Cav1.2-containing LTCCs are clustered at specific sites on the PM where they participate in  
70 supramolecular protein complexes that couple LTCC-mediated  $Ca^{2+}$  entry to specific  $Ca^{2+}$  signaling  
71 pathways (Dai et al., 2009; Rougier and Abriel, 2016). In neurons, LTCCs in dendritic spines participate  
72 in a complex whose output contributes to short- and long-term synaptic plasticity (Da Silva et al., 2013;  
73 Simms and Zamponi, 2014; Stanika et al., 2015; Wiera et al., 2017). Neocortical and hippocampal  
74 pyramidal neurons and dentate granule cells also have substantial LTCC populations in the soma and  
75 proximal dendrites (Westenbroek et al., 1990; Hell et al., 1993; Tippens et al., 2008; Berrout and  
76 Isokawa, 2009; Marshall et al., 2011; Kramer et al., 2012) representing the “aspiny” regions (Spruston  
77 and McBain, 2007) of these neurons. Many current models of  $Ca^{2+}$ -dependent activation of transcription  
78 factors posit that somatic LTCCs uniquely contribute to transcription factor activation by mediating  $Ca^{2+}$   
79 influx within specialized and compartmentalized signaling complexes (Wheeler et al., 2008; Ma et al.,  
80 2012; Matamales, 2012; Wheeler et al., 2012; Ma et al., 2014; Cohen et al., 2015; Yap and Greenberg,  
81 2018; Wild et al., 2019). Yet, relatively little research has focused on the molecular mechanisms  
82 underlying the spatial and functional compartmentalization of the prominent somatic population of  
83 LTCCs compared to those on dendrites and at synapses.

84         Neuronal somata lack PM compartments analogous to dendritic spines, and fundamental  
85 questions remain as to how discrete  $Ca^{2+}$  signaling events can occur in the absence of such  
86 compartmentalization. In many non-neuronal cells, LTCCs are clustered at EPJs that represent specialized  
87 microdomains for LTCC-dependent and -independent  $Ca^{2+}$  signaling (Helle et al., 2013; Lam and  
88 Galione, 2013; Burgoyne et al., 2015; Henne et al., 2015; Gallo et al., 2016; Chung et al., 2017; Dickson,  
89 2017). For example, Cav1.2-mediated  $Ca^{2+}$  entry is spatially and functionally coupled to ER ryanodine  
90 receptor (RyR)  $Ca^{2+}$  release channels at EPJs constituting the cardiomyocyte junctional dyad (Shuja and  
91 Colecraft, 2018). Localized  $Ca^{2+}$  release events (spreading  $<2 \mu\text{m}$  from the point of origin) called  $Ca^{2+}$

92 sparks arise from clusters of RyRs at these EPJs and are triggered *via* local Ca<sup>2+</sup>-induced Ca<sup>2+</sup> release  
93 (CICR), a feed-forward phenomenon in which cytosolic Ca<sup>2+</sup> binding to RyRs triggers their opening  
94 (Cheng et al., 1993; Cheng and Lederer, 2008). As indicated above, EPJs are abundant on neuronal  
95 somata (Wu et al., 2017), and neuronal somata have prominent LTCC- and RyR-mediated CICR (Friel  
96 and Tsien, 1992; Isokawa and Alger, 2006; Berrout and Isokawa, 2009). In addition, localized RyR-  
97 mediated Ca<sup>2+</sup> release events occur in the somata and proximal dendrites of cultured and acute slice  
98 preparations of hippocampal pyramidal neurons (Koizumi et al., 1999; Berrout and Isokawa, 2009;  
99 Manita and Ross, 2009; Miyazaki et al., 2012), but a specific molecular structure underlying these events  
100 has not been described.

101         Given the well-characterized spatial and functional coupling of LTCCs and RyRs at EPJs in  
102 myocytes and previous observations of somatodendritic clustering of the LTCC Cav1.2 in hippocampal  
103 neurons (Westenbroek et al., 1990; Hell et al., 1993), our finding that Kv2.1 clusters are often juxtaposed  
104 to RyRs previously led us to hypothesize that Kv2.1 channels cluster with LTCCs to form Ca<sup>2+</sup> “micro-  
105 signaling domains” (Antonucci et al., 2001; Misonou et al., 2005b). More recently, heterologously  
106 expressed Kv2.1 and Cav1.2 were found to colocalize in dissociated cultured hippocampal neurons  
107 (CHNs) (Fox et al., 2015). However, the spatial association of Kv2.1 with endogenous LTCCs and RyRs  
108 in brain neurons has not been determined. Here, we examined the subcellular distribution of Kv2.1,  
109 LTCCs, and RyRs in hippocampal neurons and used an unbiased proteomic analysis of brain tissue to  
110 identify LTCCs and RyRs as proteins in close spatial proximity to clustered Kv2.1. Using heterologous  
111 cells and CHNs, we investigated the impact of Kv2.1 clustering on the spatial coupling and functional  
112 properties of LTCCs and RyRs. We also defined how the localization and function of LTCCs and RyRs  
113 are affected by the loss of Kv2.1 in mouse CHNs lacking Kv2.1. Together, our findings establish a  
114 functional interaction between Kv2.1, LTCCs, and RyRs, reveal a significant influence of Kv2.1 in  
115 shaping neuronal LTCC activity, and support a critical role for Kv2.1 in the generation of somatodendritic  
116 Ca<sup>2+</sup> signals.

117

## 118 **Results**

### 119 **Kv2.1 channels spatially associate with LTCCs and RyRs in brain neurons**

120 In mature CHNs, endogenous Cav1.2 channels are distributed to PM-localized clusters on the  
121 soma and proximal dendrites, distinct from their punctate localization in the more distal postsynaptic  
122 compartments that also contain the scaffolding protein PSD-95 (Di Biase et al., 2008) (Fig. 1A). To  
123 establish whether Kv2.1 channels spatially associate with Cav1.2, we examined rat CHNs immunolabeled  
124 for Kv2.1, Cav1.2, and RyRs. In the majority of CHNs expressing detectable levels of these proteins,  
125 presumed to be pyramidal neurons based on their morphological characteristics (Benson et al., 1994;  
126 Antonucci et al., 2001; Obermair et al., 2003), we observed overlapping clusters of Kv2.1 and RyRs that  
127 were spatially associated with smaller Cav1.2 clusters (Fig. 1B). We also observed more prominent  
128 spatial overlap of Cav1.2 and Kv2.1 immunolabeling in a subset of CHNs (Fig. 1C). Super-resolution  
129 structured illumination (SIM) imaging revealed that Kv2.1 clusters often encompassed smaller clusters of  
130 Cav1.2 as well Cav1.3 (Fig. 1D-E). We found that the spatial distributions of Kv2.1 and Cav1.2 puncta  
131 significantly correlated ( $p < 0.001$  versus the null hypothesis that the distributions of Kv2.1 and Cav1.2  
132 puncta are independent) and could not be recapitulated in images in which their relative positions had  
133 been iteratively randomized in silico (Helmuth et al., 2010; Shivanandan et al., 2013). We also observed  
134 similar expression patterns of endogenous Cav1.3 and RyRs in CHNs, with Cav1.3 clusters spatially  
135 associated with RyR clusters (Fig. 1F).

136 We next evaluated how phosphorylation-dependent dispersal of Kv2.1 clusters influenced the  
137 localization of somatic Cav1.2 and RyRs in rat CHNs. One stimulus that results in dispersal of Kv2.1 in  
138 CHNs is acute elevation in intracellular  $Ca^{2+}$  caused by the excitatory neurotransmitter glutamate  
139 (Misonou et al., 2004; Misonou et al., 2006). We found that glutamate stimulation of CHNs not only  
140 reduced Kv2.1 clustering, but also significantly decreased the colocalization between Cav1.2 and RyRs  
141 and increased the distance between somatic Cav1.2 clusters (Table 1). We also found that glutamate  
142 stimulation decreased the number of Cav1.2 clusters present on the PM, consistent with previous  
143 observations that acute  $Ca^{2+}$  influx results in endocytosis of Cav1.2 channels (Hall et al., 2013). Together,

144 these data show that declustering of Kv2.1 in the PM is associated with reduced somatic coupling of  
145 Cav1.2 and RyR localization.

**Table 1.**  
**Cav1.2 and RyR colocalization parameters in rat CHNs**

|                                                        | Vehicle<br>(n=24) | Glutamate<br>(n=18) | <i>t</i> -test |
|--------------------------------------------------------|-------------------|---------------------|----------------|
| Kv2.1 labeling intensity coefficient of variation (CV) | 0.91 ± 0.030      | 0.82 ± 0.022        | 0.03551        |
| Pearson's correlation coefficient RyR:Cav1.2           | 0.14 ± 0.014      | 0.08 ± 0.010        | 0.00154        |
| Cav1.2 cluster per μm <sup>2</sup> of somatic membrane | 0.42 ± 0.016      | 0.34 ± 0.019        | 0.00315        |
| Mean area Cav1.2 cluster (μm <sup>2</sup> )            | 0.06 ± 0.001      | 0.05 ± 0.003        | 0.56806        |
| RyR clusters per μm <sup>2</sup> of somatic membrane   | 0.50 ± 0.032      | 0.62 ± 0.131        | 0.34482        |
| Mean area RyR cluster (μm <sup>2</sup> )               | 0.17 ± 0.006      | 0.11 ± 0.011        | 0.00001        |
| Mean Cav1.2 cluster NND (μm)                           | 0.91 ± 0.019      | 1.01 ± 0.028        | 0.00389        |

146  
147 We next assessed the localization of Kv2.1, Cav1.2, and RyRs in brain sections. Previous  
148 immunohistochemical analyses showed that in hippocampal neurons, Cav1.2 localizes to distinct clusters  
149 on somata and proximal dendrites (Westenbroek et al., 1990; Hell et al., 1993), a spatial pattern similar to  
150 that of Kv2.1 (Trimmer, 1991; Scannevin et al., 1996; Kirizis et al., 2014). Similar to previous  
151 observations, in low magnification images of mouse and rat hippocampus, we observed Cav1.2  
152 immunolabeling concentrated in CA1 neuron somata, with increasing labeling in area CA2/CA3 neurons,  
153 and greatest labeling in dentate gyrus (DG) granule cell somata and dendrites (Fig. 1G-H). In higher  
154 magnification confocal images of DG granule cell bodies, we found that Kv2.1 clusters tended to  
155 colocalize with Cav1.2 clusters (Fig. 1I). The somata of CA1 pyramidal neurons had less intense Cav1.2  
156 immunoreactivity, and colabeling with Kv2.1 was not as pronounced as in DG granule cells; however, the  
157 spatial association of Cav1.2, Kv2.1, and RyR immunolabeling in these cells was comparable to CHNs  
158 (Fig. 1J). Similar labeling was observed in high-magnification images of mouse brain sections (Fig. 1K-  
159 L). Kv2.2, which also clusters at EPJs through the same mechanism as Kv2.1 (Kirmiz et al., 2018b),  
160 similarly colocalized with Cav1.2 immunolabeling in CA1 pyramidal cells and DG granule cells (Fig.  
161 S1).

162

163 **Crosslinking-based proteomic analyses support that Kv2.1 channels are in close spatial proximity**  
164 **to LTCCs and RyRs in brain neurons**

165         These findings indicated that LTCCs are spatially associated with Kv2.1 and RyRs in brain  
166 neurons. We next interrogated proteins within the Kv2.1 nano-environment using a crosslinking- and  
167 mass spectrometry-based proteomics approach to determine whether LTCCs and RyRs are in close spatial  
168 proximity (having lysine residues within  $\approx 12$  Å of one another) to Kv2.1. We affinity immunopurified  
169 (IPed) Kv2.1 from mouse brain homogenates that were subjected to chemical cross-linking during  
170 homogenization. This strategy previously allowed us to identify the ER-resident VAP proteins as Kv2  
171 channel binding partners (Kirmiz et al., 2018b). Importantly, we also performed parallel IPs from brain  
172 homogenates prepared from Kv2.1 knockout (KO) mice (Jacobson et al., 2007; Speca et al., 2014) using  
173 the same Kv2.1 antibody, to identify proteins IPing in a Kv2.1-independent manner. To further improve  
174 the recovery of peptides IPed with Kv2.1, we performed on-bead trypsin digestion (Fig. S2), as opposed  
175 to the in-gel digestion we had done previously (Kirmiz et al., 2018b). Similar to our earlier findings,  
176 enriched in the control Kv2.1 IPs (and otherwise absent from the Kv2.1 KO brain IPs) were the VAP  
177 isoforms VAPA and VAPB (Table 1). In addition, among the most abundant 50 proteins specifically  
178 present in Kv2.1 IPs (*i.e.*, from WT and not Kv2.1 KO brain samples) were numerous proteins involved  
179 in  $Ca^{2+}$  signaling and/or previously reported to localize to neuronal EPJs. These included RyR isoforms  
180 RyR2 and RyR3, the LTCC  $\alpha$  subunits Cav1.2 and Cav1.3, various Cav $\beta$  auxiliary subunits of LTCCs, as  
181 well as other proteins involved in  $Ca^{2+}$  signaling and homeostasis (Table 2). Taken together with our  
182 imaging analyses, these findings indicate that Kv2.1 is in close spatial proximity to LTCCs and RyRs at  
183 EPJs in mouse brain neurons. We note that while Cav1.2 is the predominant LTCC  $\alpha$ 1 subunit in  
184 hippocampus (Hell et al., 1993; Davare et al., 2001; Moosmang et al., 2005; Lacinova et al., 2008;  
185 Sinnegger-Brauns et al., 2009), where its localization on neuronal somata overlaps with Kv2.1, it was not  
186 as highly represented in these proteomic analyses as was Cav1.3, perhaps as these analyses were  
187 performed on whole brain samples.

188



189 **Table 2.**

190 **LTCC subunits and other Ca<sup>2+</sup> signaling proteins specifically copurifying with Kv2.1**

| <b>Protein</b>                         | <b>Rank</b> | <b>Mean</b> | <b>SEM (n=3)</b> |
|----------------------------------------|-------------|-------------|------------------|
| Kv2.1                                  | 1           | 100.000     | NA               |
| Kv2.2                                  | 3           | 31.638      | 0.518            |
| VAPA                                   | 5           | 25.344      | 1.733            |
| RyR3                                   | 10          | 12.477      | 0.881            |
| Cav $\beta$ 4                          | 12          | 11.133      | 1.411            |
| VAPB                                   | 15          | 7.600       | 1.393            |
| Cav $\beta$ 2                          | 18          | 5.623       | 0.79             |
| Cav1.3                                 | 19          | 5.730       | 1.652            |
| Cav $\beta$ 3                          | 23          | 5.070       | 1.033            |
| Hippocalcin                            | 24          | 4.583       | 0.831            |
| Neurocalcin-delta                      | 25          | 4.590       | 0.856            |
| SR/ER calcium ATPase 2                 | 28          | 4.226       | 2.4              |
| Hippocalcin-like protein 1             | 29          | 4.360       | 0.288            |
| Cav $\beta$ 1                          | 33          | 3.800       | 0.697            |
| Calcineurin catalytic subunit $\gamma$ | 35          | 3.583       | 0.718            |
| RyR2                                   | 36          | 3.140       | 0.903            |
| Calcineurin subunit B                  | 37          | 3.197       | 0.469            |
| Calcium-transporting ATPase            | 39          | 2.873       | 0.447            |
| SR/ER calcium ATPase 1                 | 40          | 2.530       | 1.21             |
| Cav1.2                                 | 43          | 2.427       | 0.766            |

191

192 **Kv2.1 organizes the localization of cell surface LTCCs**

193 Because our immunolabeling and proteomics results indicated that endogenous Cav1.2 channels  
194 spatially associate with clustered Kv2.1 in hippocampal neurons, we next investigated how the subcellular  
195 localization of Cav1.2 (expressed with the LTCC auxiliary subunits  $\alpha_2\delta_1$  and  $\beta_3$ ) was influenced by the  
196 presence of Kv2.1 in heterologous HEK293T cells. HEK293T cells lack endogenous Kv2.1 or Kv2.2  
197 channels (Yu and Kerchner, 1998), and have little to no expression of LTCCs (Berjukow et al., 1996;  
198 Geiger et al., 2012). Expression of conducting or non-conducting Kv2 channels in these cells induces EPJ  
199 formation (Fox et al., 2015; Bishop et al., 2018; Kirmiz et al., 2018b). Using total internal reflection  
200 fluorescence (TIRF) microscopy to visualize Cav1.2-GFP expressed in HEK293T cells, we observed

201 small ( $0.27 \pm 0.24 \mu\text{m}^2$ ) Cav1.2 clusters adjacent to cortical ER marked by the general ER marker BFP-  
202 SEC61b (Fig 2A). However, in the presence of Kv2.1, the PM organization of Cav1.2 was dramatically  
203 altered, such that Cav1.2 now co-assembled with Kv2.1 into significantly larger clusters ( $1.05 \pm 0.67 \mu\text{m}^2$ )  
204 (Fig 2A-B). The Kv2.1-induced rearrangement of Cav1.2 was accompanied by an increased occurrence of  
205 larger Cav1.2 clusters and a reduced occurrence of smaller Cav1.2 clusters, and a nearly linear  
206 relationship between the sizes of Cav1.2 and Kv2.1 clusters (Fig 2B). Kv2.2 channels similarly recruited  
207 Cav1.2 into large clusters (Fig 2C). We determined that the impact of Kv2.1 expression on Cav1.2  
208 clustering did not require Kv2.1  $\text{K}^+$  conductance, as coexpression of a  $\text{K}^+$ -impermeable point mutant  
209 (Kv2.1<sub>P404W</sub>) induced clustering of Cav1.2 comparable to WT Kv2.1 (Fig. 2D-E). Conversely,  
210 coexpression with a Kv2.1 point mutant (Kv2.1<sub>S586A</sub>), deficient in clustering (Lim et al., 2000) and in  
211 inducing EPJ formation (Kirmiz et al., 2018b), had no effect on Cav1.2 clustering (Fig. 2D-E). We also  
212 found that the localization of GFP-tagged Cav1.3 was similarly altered upon coexpression with Kv2.1 or  
213 Kv2.2, implying a common mechanism for co-clustering of LTCCs with Kv2 channels (Fig S3).

214 Because TIRF microscopy illuminates subcellular structures up to 100 nm away from the PM, we  
215 confirmed whether the observed co-clustering of Cav1.2 with Kv2.1 was occurring within the PM itself.  
216 We performed cell surface immunolabeling of intact cells coexpressing Kv2.1 and a Cav1.2 construct  
217 possessing an extracellular hemagglutinin epitope tag [Cav1.2-HA, (Obermair et al., 2004)]. Similar to  
218 cells expressing fluorescently tagged channels and imaged using TIRF microscopy, we found that PM-  
219 localized Cav1.2-HA co-clustered with PM Kv2.1, whereas the unrelated Kv1.5 channel did not cluster or  
220 associate with Cav1.2 (Fig. 2F-G). Moreover, Kv2.1 coexpression did not alter the PM localization of the  
221 T-type  $\text{Ca}^{2+}$  channel Cav3.1 (Fig. 2H-I). This observation suggests that the Kv2.1-mediated spatial  
222 reorganization of LTCCs is specific to their association with Kv2.1, a notion also supported by the  
223 absence of T-type  $\text{Ca}^{2+}$  channels from our Kv2.1 IP experiments.

224 We also assessed whether RyRs could be recruited to EPJs induced by Kv2.1. For these  
225 experiments, we expressed Kv2.1 along with Cav1.2, the LTCC auxiliary subunits  $\alpha_2\delta_1$  and  $\beta_3$ , RyR2,  
226 and the STAC1 adaptor protein, an approach similar to that previously used to recapitulate Cav1.1- and

227 RyR1-mediated  $\text{Ca}^{2+}$  release in HEK293T cells (Perni et al., 2017). We found that in the presence of these  
228 auxiliary subunits, Kv2.1, Cav1.2, and RyR2 could spatially associate in HEK293T cells, similar to their  
229 association in hippocampal neurons (Fig. 2J-K). Together, these data demonstrate that clustered but not  
230 non-clustered Kv2 channels enhance LTCC clustering and increase their localization to EPJs as a  
231 nonconducting function, and that the spatial association of Kv2.1, Cav1.2, and RyRs seen in neurons can  
232 be recapitulated in HEK293T cells.

233

### 234 **Neuronal Kv2.1 channels functionally associate with endogenous LTCCs and RyRs**

235 Kv2.1, when fused to fluorescent proteins such as GFP, clusters at neuronal EPJs similar to  
236 untagged or endogenous Kv2.1 (Antonucci et al., 2001; Kirmiz et al., 2018b). To begin to evaluate  $\text{Ca}^{2+}$   
237 signals at neuronal Kv2.1-associated EPJs, we fused the genetically-encoded  $\text{Ca}^{2+}$  indicator GCaMP3  
238 (derived from GFP) to  $\text{K}^{+}$ -conducting and -nonconducting Kv2.1 channel isoforms and expressed these  
239 constructs in rat CHNs. GCaMP3 has previously been used to study near-membrane  $\text{Ca}^{2+}$  signaling  
240 microdomains in astrocytes (Shigetomi et al., 2010), and its higher basal fluorescence relative to newer  
241 GCaMP variants facilitated identification of transfected neurons. In rat CHNs, GCaMP3-Kv2.1 exhibited  
242 clustered localization similar to other fluorescently tagged Kv2.1 isoforms (Fig. 3A) and reported global  
243  $\text{Ca}^{2+}$  spikes, as indicated by the synchronized increase in fluorescence across the PM at sites where the  
244 construct was clustered and also in regions with diffuse GCaMP3-Kv2.1 expression (Fig. 3B, movie S1).  
245 In addition to synchronized  $\text{Ca}^{2+}$  spikes, we also observed rapid and stochastic  $\text{Ca}^{2+}$  signals occurring at a  
246 subset of individual GCaMP3-Kv2.1 clusters within the soma (Fig. 3B-C, movie S1). These  $\text{Ca}^{2+}$  signals  
247 were confined to individual clusters such that the fluorescence of adjacent GCaMP3-Kv2.1 clusters  $<1$   
248  $\mu\text{m}$  from the active clusters remained stable (Fig. 3B, compare regions of interest 2 and 4). We found that  
249  $\text{Ca}^{2+}$  signal amplitude, frequency, and width were insensitive to the  $\text{K}^{+}$  conductance of the GCaMP3-  
250 Kv2.1 reporter, as  $\text{Ca}^{2+}$  signals detected by a  $\text{K}^{+}$ -impermeable variant of this construct (GCaMP3-  
251 Kv2.1<sub>P404W</sub>) showed no difference in any of these parameters relative to GCaMP3-Kv2.1 (Fig. 3D).

252           Next, we assessed the relationship between GCaMP3-Kv2.1 reported  $\text{Ca}^{2+}$  signals and membrane  
253 potential ( $V_m$ ). We performed current clamp experiments to monitor the  $V_m$  and sparks simultaneously,  
254 using the whole-cell perforated patch clamp configuration. Spontaneous action potentials were associated  
255 with  $\text{Ca}^{2+}$  spikes, suggesting that these synchronized, large-amplitude  $\text{Ca}^{2+}$  transients reflected  $\text{Ca}^{2+}$  entry  
256 through voltage-gated  $\text{Ca}^{2+}$  channels as well as release through RyRs (Fig. 3E). However, unlike global  
257  $\text{Ca}^{2+}$  spikes, the localized  $\text{Ca}^{2+}$  signals displayed no clear relationship with action potentials or other  
258 spontaneous  $V_m$  fluctuations, similar to previous observations of localized  $\text{Ca}^{2+}$  release events in CA1  
259 pyramidal neurons (Berrout and Isokawa, 2009; Manita and Ross, 2009).

260           As heterologous expression of Kv2.1 in CHNs is known to result in large Kv2.1 “macroclusters”  
261 that recruit RyRs (Antonucci et al., 2001), we next determined whether somatic  $\text{Ca}^{2+}$  signals occurred at  
262 native Kv2.1-associated EPJs. For these experiments, we used non-transfected CHNs loaded with the  
263  $\text{Ca}^{2+}$  dye Cal-590 AM and recorded sparks using TIRF microscopy. Using this approach, it was possible  
264 to detect spontaneous, localized  $\text{Ca}^{2+}$  release events in the soma that were qualitatively similar to those  
265 recorded with GCaMP3-Kv2.1 (Fig. 3F-G, movie S2). *Post-hoc* immunolabeling of these CHNs for  
266 Kv2.1, RyRs, and the neuron-specific cytoskeletal protein MAP2 indicated that the observed localized  
267  $\text{Ca}^{2+}$  signals occurred primarily within the soma at sites of colocalized Kv2.1 and RyR clusters (Fig. 3F).

268           These observations suggested that the  $\text{Ca}^{2+}$  signals observed at neuronal Kv2.1-associated EPJs  
269 reflected RyR-generated  $\text{Ca}^{2+}$  sparks. To further assess this possibility, we imaged GCaMP3-Kv2.1-  
270 expressing CHNs treated with compounds that modulate LTCC- and RyR-mediated CICR. We found that  
271 caffeine, which sensitizes RyRs to cytosolic  $\text{Ca}^{2+}$ , enhanced the frequency of localized  $\text{Ca}^{2+}$  sparks (Fig.  
272 4A, B, movie S3). In contrast, depletion of ER  $\text{Ca}^{2+}$  stores with the sarco-/endo-plasmic reticulum  $\text{Ca}^{2+}$   
273 ATPase (SERCA) inhibitor thapsigargin led to an elimination of  $\text{Ca}^{2+}$  sparks (Fig. 4A-B). The functional  
274 coupling of dendritic LTCCs and RyRs in hippocampal neurons has previously been demonstrated by the  
275 impact of dihydropyridine (DHP) compounds on dendritic sparks: the LTCC agonist Bay K8644  
276 increased spark frequency, whereas the LTCC inhibitor nimodipine blocked sparks (Manita and Ross,  
277 2009). Here, we obtained similar evidence of the involvement of LTCCs in the generation of somatic

278 GCaMP3-Kv2.1 reported  $\text{Ca}^{2+}$  sparks, whose frequency was enhanced by activation of LTCCs with Bay  
279 K8644 (Fig 4A, B, D, movie S4). Conversely,  $\text{Ca}^{2+}$  sparks were rapidly inhibited by blockade of LTCCs  
280 with nimodipine (Fig. 4A-B). We also performed *post-hoc* immunolabeling of imaged CHNs to determine  
281 whether the specific GCaMP3-Kv2.1 clusters which exhibited localized  $\text{Ca}^{2+}$  signals were associated with  
282 RyRs. Using this approach, we determined that the subset of GCaMP3-Kv2.1 clusters that colocalized  
283 with RyRs corresponded to the clusters that produced localized  $\text{Ca}^{2+}$  signals, either spontaneously or in  
284 response to the pharmacological modulators caffeine (Fig. 4C) and Bay K8644 (Fig. 4D). We also  
285 quantified the relationship between the size of *post-hoc* immunolabeled RyR clusters and spark frequency  
286 and amplitude. Similar to previous observations in vascular smooth muscle (Pritchard et al., 2018) and  
287 cardiac muscle (Galice et al., 2018) cells, we found that neuronal  $\text{Ca}^{2+}$  spark frequency but not amplitude  
288 correlated with RyR cluster size, and that application of the LTCC agonist Bay K8644 steepened this  
289 relationship (Fig. 4E). Taken together, these observations demonstrate that Kv2.1-associated EPJs are  
290 sites of spontaneous CICR events mediated by LTCCs and RyRs.

291

### 292 **Kv2.1 augments LTCC and RyR2-mediated CICR reconstituted in HEK293T cells**

293 We next asked how Kv2.1-induced clustering of LTCCs would impact RyR-mediated  $\text{Ca}^{2+}$   
294 release in HEK293T cells. For these experiments, we expressed Kv2.1 along with Cav1.2, the LTCC  
295 auxiliary subunits  $\alpha_2\delta_1$  and  $\beta_3$ , RyR2, , and the STAC1 adaptor protein, which leads to co-clustering of  
296 Kv2.1, Cav1.2 and RyR2, as demonstrated in Fig. 2J-K. To detect  $\text{Ca}^{2+}$  release events, we performed  
297 TIRF microscopy of cells loaded with the  $\text{Ca}^{2+}$ -sensitive dye Cal-590 AM. Although it was not possible to  
298 establish whether a cell expressed all transfected constructs, we observed spontaneous  $\text{Ca}^{2+}$  release events  
299 in a subset of cells (Fig. 5A, D) that were not seen in untransfected HEK293T cells and focused our  
300 analysis on cells that exhibited this phenotype. These spontaneous  $\text{Ca}^{2+}$  release events were rapidly  
301 blocked by the RyR inhibitor tetracaine (Fig. 5F, movie S5), suggesting that they reflected CICR  
302 mediated by RyRs. Expressing Kv2.1 in these cells resulted in enhanced spark frequency and amplitude  
303 (Fig. 5B-C, E). Similar results were obtained using Cav1.3 in place of Cav1.2 (Fig. S4). To better

304 understand the mechanism underlying the influence of Kv2.1 on these reconstituted Ca<sup>2+</sup> sparks, we next  
305 compared how they were affected by the non-conducting Kv2.1<sub>P404W</sub> and the non-clustering Kv2.1<sub>S586A</sub>  
306 point mutants (Fig. 5H). By using these Kv2.1 isoforms, we determined that there was an interplay  
307 between both Kv2.1 K<sup>+</sup> conductance and clustering on Ca<sup>2+</sup> sparks reconstituted in HEK293T cells.  
308 Expression of Kv2.1 channels capable of clustered EPJ formation (i.e., Kv2.1<sub>WT</sub> and Kv2.1<sub>P404W</sub>)  
309 increased spark frequency, whereas non-clustering Kv2.1<sub>S586A</sub> did not (Fig. 5I). Interestingly, we found  
310 that spark amplitude was enhanced by K<sup>+</sup>-conducting Kv2.1<sub>WT</sub> but not Kv2.1<sub>P404W</sub>, suggesting that while  
311 Kv2.1-mediated clustering alone was sufficient to impact spark frequency, K<sup>+</sup> conductance was required  
312 to impact the amplitude of reconstituted Ca<sup>2+</sup> sparks. In conclusion, these observations indicate that  
313 Kv2.1-mediated clustering promotes the functional coupling of Cav1.2 and RyRs.

314

### 315 **Kv2.1 reduces the voltage threshold for Cav1.2 opening**

316 Having demonstrated a spatial and functional association of Kv2.1, LTCCs, and RyRs in  
317 hippocampal neurons that could be reconstituted in HEK293T cells, we next investigated whether  
318 clustering by Kv2.1 influenced the Cav1.2-mediated LTCC activity. As physical interactions between  
319 adjacent LTCCs promote enhanced LTCC activity (reducing the membrane voltage threshold for channel  
320 opening and elevating channel open probability) (Navedo et al., 2005; Dixon et al., 2012; Moreno et al.,  
321 2016), we reasoned that this functional property of Cav1.2 might be enhanced by Kv2.1-induced  
322 clustering. To test this possibility, we obtained whole-cell patch-clamp recordings from HEK293T cells  
323 transfected with Cav1.2 and the non-K<sup>+</sup> conducting Kv2.1<sub>P404W</sub> point mutant, which allowed us to  
324 measure Ca<sup>2+</sup> currents ( $I_{Ca}$ ) in the absence of the very large outward K<sup>+</sup> currents produced by Kv2.1<sub>WT</sub>.  
325 Consistent with an influence of Cav1.2 spatial organization on its activity, we found that expression of  
326 Cav1.2 with Kv2.1<sub>P404W</sub> more than doubled peak  $I_{Ca}$  as compared to cells expressing Cav1.2 alone (Fig.  
327 6A-B). Analysis of the conductance-voltage ( $G$ - $V$ ) relationship also showed an influence of Kv2.1 on the  
328  $V_m$  threshold for Cav1.2 opening, with currents produced by Cav1.2 activating at more negative voltages  
329 in the presence of Kv2.1<sub>P404W</sub> than those produced by Cav1.2 alone, with no effect on steady-state

330 inactivation (Fig. 6C). Cells co-expressing STAC1 with Cav1.2 and Kv2.1<sub>P404W</sub> also exhibited an increase  
331 in whole-cell  $I_{Ca}$  and a hyperpolarized shift in Cav1.2 opening, similar to results obtained without STAC1  
332 (Fig. S5). Measurement of  $Ca^{2+}$ -induced fluorescence increases in cells loaded with the  $Ca^{2+}$ -sensitive dye  
333 Rhod-2 via the patch pipette also revealed an enhancing effect of Kv2.1<sub>P404W</sub> on Cav1.2-mediated  $Ca^{2+}$   
334 influx (Fig. 6F). Similarly, HEK293T cells loaded with the  $Ca^{2+}$  dye Fluo-4 and expressing Cav1.2 and  
335 either Kv2.1<sub>WT</sub> or Kv2.1<sub>P404W</sub> displayed greater  $K^+$ -depolarization induced  $Ca^{2+}$  influx than control cells  
336 (Fig. 6G-H), further supporting that  $K^+$ -conducting as well as -nonconducting isoforms of Kv2.1 augment  
337 Cav1.2 activity.

338 Ion channel activity can be described by the product of the number of channels present in the PM  
339 ( $n$ ), the channel's unitary conductance ( $i$ ), and the open probability of these channels ( $P_o$ ), such that the  
340 whole cell current  $I$  can be described by the relationship  $I=nP_o i$ . Thus, the enhancement of Cav1.2  
341 activity observed in the presence of Kv2.1 could be caused by an effect on any one or more of these  
342 parameters. To better understand the underlying mechanism, we acquired gating and ionic tail currents  
343 from the same cell. Depolarization-induced voltage sensor movement in activating voltage-gated channels  
344 produces a gating current ( $Q_{on}$ ) that is proportional to the number of channels present in the PM ( $n$ ).  
345 Repolarization-induced ionic tail currents ( $I_{tail}$ ) reveal overall channel activity ( $I$ ). Changes in one or both  
346 can be used to infer whether it is " $n$ " versus some combination of " $P_o$ " and/or " $i$ " that yield changes in  
347 total channel activity. We used nitrendipine, a DHP LTCC gating inhibitor, to pharmacologically isolate  
348 Cav1.2  $Q_{on}$  when the  $V_m$  was stepped to the  $I_{Ca}$  reversal potential, and to measure  $I_{tail}$  elicited by returning  
349 to the -70 mV holding potential (Fig. 6D). Nitrendipine-sensitive  $Q_{on}$  values produced by Cav1.2 alone  
350 were comparable to those measured in the presence of Kv2.1, indicating that the increased  $I_{Ca}$  in cells  
351 coexpressing Kv2.1 was not associated with an increase in the number of PM Cav1.2 channels (Fig. 6E).  
352 However, the nitrendipine-sensitive  $I_{tail}$  was significantly greater in the presence of Kv2.1, demonstrating  
353 that the open probability and/or conductance of Cav1.2 was increased when co-expressed with Kv2.1. As  
354 comparable  $Q_{on}$  values (i.e., Cav1.2 voltage sensor movement) produced a larger  $I_{tail}$  in the presence of

355 Kv2.1, taken together with the altered G-V curve shown in Fig. 6C suggests that the Kv2.1-dependent  
356 increase in  $I_{Ca}$  apparently came from enhanced Cav1.2 voltage sensor coupling to channel opening.

357         These observations showed that Cav1.2 channel activity was enhanced in the presence of Kv2.1.  
358 Therefore, we next asked whether LTCC currents were altered in CHNs lacking Kv2.1. For these  
359 experiments, we chose to record from CHNs as opposed to acutely dissociated neurons. Although the  
360 round morphology of acutely dissociated neurons enables much better control of the  $V_m$  than in arborized  
361 neurons, we reasoned based on the loss of Kv2.1 clustering upon dissociation in other cell types  
362 expressing clustered Kv2.1 (PC12, MDCK, and HEK293 cells; J.S. Trimmer, unpublished observations),  
363 and that endogenous Kv2.1 clusters in CHNs are sensitive to changes in intracellular  $Ca^{2+}$  and metabolism  
364 (Misonou et al., 2005a), that acute dissociation would disrupt the clustered localization of Kv2.1,  
365 potentially concealing LTCC regulation by Kv2.1 clustering. To improve somatic voltage clamp, we used  
366 recording solutions lacking  $Na^+$  and containing  $Cs^+$  and  $Ba^{2+}$  (which block  $K^+$  channels;  $Ba^{2+}$  also  
367 permeates voltage-gated  $Ca^{2+}$  channels) to increase membrane impedance. We focused our analyses of  
368 electrophysiological recordings on repolarization-induced tail currents after activation of channels by a  
369 depolarizing prepulse, rather than measurement of currents induced by depolarizing voltage steps that can  
370 be distorted due to space clamp limitations (e.g., see (Milescu et al., 2010)). Similar to our findings in  
371 HEK293T cells, whole cell  $Ba^{2+}$  currents ( $I_{Ba}$ ) at +10 mV, as well as LTCC tail currents (Fig. 7B, C) were  
372 larger in CHNs from WT mice than those measured in Kv2.1 KO CHNs (Fig. 7A-C). To isolate the  
373 LTCC component of  $I_{Ba}$ , we applied the LTCC gating inhibitor nimodipine (10  $\mu$ M), and found that the  
374 reduced  $I_{Ba}$  observed in Kv2.1 KO CHNs (Fig. 7A-C) was primarily due to a reduction in the nimodipine-  
375 sensitive component of the current (Fig. 7A, B, E), with no apparent difference in the nimodipine-  
376 resistant current (Fig. 7A, B, D). We also examined nimodipine-sensitive gating and ionic tail currents  
377 when the  $V_m$  was stepped to the  $I_{Ba}$  reversal potential and found that while  $Q_{on}$  was not significantly  
378 different between control and Kv2.1 KO CHNs, peak  $I_{tail}$  was reduced in Kv2.1 KO CHNs (Fig. 7F-G).  
379 The data in Fig. 6 (from exogenously expressed channels in HEK293T cells) and Fig. 7 (from  
380 endogenously expressed channels in CHNs) show that Kv2.1 enhances neuronal LTCC activity and



381 suggest that the underlying mechanism involves enhanced coupling efficiency between LTCC voltage  
382 sensor movement and channel opening due to Kv2.1-mediated clustering.

383

### 384 **Kv2.1 promotes spatial coupling of LTCCs and RyRs**

385         Given that Kv2.1-mediated clustering impacts the spatial distribution of Cav1.2 in coexpressing  
386 HEK293T cells, we next examined whether loss of Kv2.1 was associated with changes in the expression  
387 and localization of Cav1.2. We first performed immunolabeling of hippocampal neurons in brain sections  
388 from adult control and Kv2.1 KO mouse littermates. We have previously determined that the anatomic  
389 structure of mouse brains lacking Kv2.1 is comparable to controls, and there do not appear to be  
390 compensatory changes in the expression of other Kv channels tested (Specca et al., 2014). Here, we  
391 confirmed that immunolabeling for somatodendritic Kv2.2 and also dendritic Kv4.2 channels was similar  
392 in WT and Kv2.1 KO hippocampus (Fig. 8A-C). However, Cav1.2 labeling was increased in pyramidal  
393 neurons in area CA1 in Kv2.1 KO brain sections, both within the cell bodies and in the apical dendrites  
394 (Fig. 8C). These results suggest that in adult mice lacking functional Kv2.1 channels, Cav1.2 expression  
395 may be elevated, potentially as a compensatory mechanism to overcome reduced Cav1.2 channel  
396 function.

397         To obtain more detailed individual cell information, we next investigated how the loss of  
398 endogenous Kv2.1 influenced the localization and function of LTCCs and RyRs in WT and Kv2.1 KO  
399 CHNs. To determine whether Kv2.1 channels regulate the localization of somatodendritic Cav1.2 and/or  
400 RyRs, we first analyzed the size and morphology of immunolabeled Cav1.2 and RyR clusters in control  
401 and Kv2.1 KO mouse CHNs. We found reduced colocalization between Cav1.2 clusters and RyR clusters  
402 in the absence of Kv2.1, and increased distance between Cav1.2 clusters (Fig. 8D-E, Table 3). In addition,  
403 we found that although the total number of somatic RyR clusters was not altered by the loss of Kv2.1, the  
404 size of individual RyR clusters was significantly reduced (Table 3). However, unlike the increased Cav1.2  
405 immunolabeling found in adult Kv2.1 KO mouse brain sections, we found that neither the number nor  
406 size of somatic Cav1.2 clusters differed between WT and Kv2.1 KO CHNs. These observations suggests

407 that while compensatory changes in Cav1.2 expression did not occur in cultured Kv2.1 KO CHNs after  
408 approximately two weeks *in vitro* as it did in adult brain neurons *in vivo*, the presence of Kv2.1 promoted  
409 the spatial coupling of Cav1.2 to RyRs.

**Table 3.**  
**Cav1.2 and RyR colocalization parameters in mouse CH**

| Parameter                                               | WT<br>(n=29;4) | Kv2.1 KO<br>(n=19;4) | t-test  |
|---------------------------------------------------------|----------------|----------------------|---------|
| Pearson's correlation coefficient RyR:Cav1.2            | 0.26 ± 0.021   | 0.19 ± 0.022         | 0.02547 |
| Cav1.2 clusters per $\mu\text{m}^2$ of somatic membrane | 0.43 ± 0.018   | 0.38 ± 0.026         | 0.11256 |
| Mean area Cav1.2 cluster ( $\mu\text{m}^2$ )            | 0.07 ± 0.005   | 0.06 ± 0.003         | 0.21286 |
| RyR clusters per $\mu\text{m}^2$ of somatic membrane    | 0.62 ± 0.025   | 0.61 ± 0.042         | 0.89444 |
| Mean area RyR cluster ( $\mu\text{m}^2$ )               | 0.19 ± 0.010   | 0.14 ± 0.009         | 0.00144 |
| Mean Cav1.2 NND ( $\mu\text{m}$ )                       | 0.89 ± 0.017   | 0.96 ± 0.023         | 0.01726 |

410  
411 Finally, to evaluate how impaired Cav1.2 and RyR spatial coupling in Kv2.1 KO CHNs affected  
412 spontaneous CICR events or sparks, we imaged Cal-590-loaded cells using TIRF microscopy. Similar to  
413 rat CHNs, we observed spontaneous sparks in WT mouse CHNs that were associated with Kv2.1, Cav1.2,  
414 and RyR clusters identified by *post-hoc* immunolabeling (Fig. 8F). Consistent with the reduced  
415 colocalization of Cav1.2 and RyRs in Kv2.1 KO CHNs, we found that loss of Kv2.1 was associated with  
416 a significant reduction in spark frequency relative to WT control CHNs (Fig. 8G). Taken together, these  
417 findings demonstrate that Kv2.1 channels promote the spatial and functional association of endogenous  
418 Cav1.2 and RyRs in neurons, as well as the corresponding exogenous channels in HEK293T cells.

419

## 420 Discussion

421 The findings in this study support a new model for the formation of  $\text{Ca}^{2+}$  signaling microdomains  
422 at EPJs and the local control of  $\text{Ca}^{2+}$  release from these structures. In this model, neuronal EPJs are  $\text{Ca}^{2+}$   
423 signaling microdomains in which Cav1.2 and RyRs are brought into close proximity by Kv2.1-mediated  
424 clustering, forming a specialized somatic complex for the generation of localized  $\text{Ca}^{2+}$  signals by these  
425  $\text{Ca}^{2+}$  channels. We propose that Kv2.1 channels function not only to anchor the ER to the PM but also to  
426 promote the organization of Cav1.2 channels into clusters in direct apposition to nearby ER RyRs. Our

427 data indicate that Kv2.1-mediated clustering also increases the activity of Cav1.2. Spontaneous openings  
428 of Cav1.2 channels at negative potentials allow a small amount of  $\text{Ca}^{2+}$  to enter the cell at EPJs, activating  
429 nearby RyRs by the mechanism of CICR. The resulting  $\text{Ca}^{2+}$  sparks occur independently of action  
430 potentials. Thus, our model proposes a molecular structure underlying the localized somatodendritic  $\text{Ca}^{2+}$   
431 signals previously observed in brain neurons (Berrout and Isokawa, 2009; Manita and Ross, 2009), and  
432 suggests a mechanism whereby Kv2.1 modulates these  $\text{Ca}^{2+}$  signals by simultaneously promoting the  
433 spatial association of Cav1.2 channels with RyRs and increasing their activity to trigger CICR.

434

### 435 **Kv2 channels dynamically cluster LTCCs**

436 A key finding in this study is that endogenous LTCCs colocalized with clustered Kv2.1 in brain  
437 neurons, a finding supported by our crosslinking-based proteomic analyses showing that they exist in  
438 close spatial proximity. Moreover, colocalization of LTCCs with Kv2.1 could be reconstituted in  
439 heterologous cells, a property that required Kv2.1's ability to cluster at EPJs but was separable from its  
440 voltage-gated  $\text{K}^+$  channel function. The Kv2.1-mediated association of Cav1.2 with EPJs appears to be  
441 dynamically regulated, as acute dispersal of Kv2.1 clusters in CHNs reduced Cav1.2's association with  
442 RyRs and increased the nearest neighbor distance between individual Cav1.2 clusters. In addition, Kv2.1  
443 expression in heterologous cells simultaneously enhanced the size of LTCC clusters and recruited LTCCs  
444 to Kv2.1-mediated EPJs. Consistent with this, we found that the spatial and functional coupling of  
445 somatic Cav1.2 channels to RyRs was reduced in Kv2.1 KO CHNs. Together, these findings indicate that  
446 LTCCs are recruited to Kv2.1-associated EPJs, a property we found was not shared by the T-type  $\text{Ca}^{2+}$   
447 channel Cav3.1. Moreover, the co-purification of several Cav $\beta$  auxiliary subunits, which associate with  
448 LTCCs but not T-Type  $\text{Ca}^{2+}$  channels such as Cav3.1 (Fang and Colecraft, 2011), by IP of Kv2.1 from  
449 crosslinked brain samples further suggests a specific spatial interaction of LTCCs with Kv2.1. Numerous  
450 proteins have been identified that promote LTCC clustering in dendritic spines, including AKAP15  
451 (Marshall et al., 2011) and PDZ domain-containing proteins (Zhang et al., 2005). The absence of these  
452 proteins from our proteomic analyses of proteins in close spatial proximity to Kv2.1, and our observation

453 that expression of Kv2.1 increases clustering Cav1.2 in heterologous HEK293 cells, suggests that the  
454 proteins mediating Cav1.2 clustering in dendritic spines and at somatic EPJs may be distinct.

455 Although the molecular mechanism of Kv2.1 recruitment to EPJs is now established, and occurs  
456 via its phosphorylation-dependent interaction with VAPs (Johnson et al., 2018; Kirmiz et al., 2018b), the  
457 precise molecular mechanisms that underlies how LTCCs and RyRs are recruited to these sites is not yet  
458 clear. However, our data show that PM Cav1.2 organization was not impacted by coexpression of the  
459 clustering- and EPJ formation-deficient Kv2.1<sub>S586A</sub> mutant as it was by Kv2.1<sub>WT</sub> and the nonconducting  
460 Kv2.1<sub>P404W</sub> point mutant. Additionally, Kv2.1<sub>S586A</sub> was unable to enhance Cav1.2- and RyR-mediated  
461 sparks reconstituted in HEK293T cells, unlike these clustering-competent Kv2.1 isoforms. These findings  
462 suggest that Kv2.1 clustering and induction of EPJs is necessary for its spatial association with LTCCs.

463 The recruitment of LTCCs to EPJs in HEK293T cells formed upon heterologous expression of  
464 junctophilin-2 (Perni et al., 2017), an ER-localized protein critical for bridging the PM to the ER in  
465 myocytes (Jiang et al., 2016), is consistent with a model whereby tethering of LTCCs at or near Kv2-  
466 associated EPJs could be mediated by an intermediary recruited to Kv2.1-mediated EPJs, perhaps even  
467 one of the proteins identified in our proteomics analyses. We note that these proteomics analyses have the  
468 potential to identify proteins with lysine residues in close spatial proximity ( $\approx 12$  Å) to those in Kv2.1,  
469 making them amenable to being crosslinked to Kv2.1 by DSP, and does not require their direct  
470 association. Moreover, the crosslinking reaction can yield “daisy-chained” protein linkages of spatially  
471 adjacent proteins. While at some point this would need to connect back to Kv2.1 to be immunopurified,  
472 the proteins present in the purified sample need not have this close spatial proximity to Kv2.1 itself.  
473 However, it remains possible that PM Kv2s and LTCCs associate through a direct intermolecular  
474 interaction. Any domains on Kv2.1 contributing to this interaction would likely be conserved in Kv2.2, as  
475 we found that both channel paralogs similarly impacted LTCC cluster size and localization. It is unlikely  
476 that RyRs are directly recruited to EPJs by Kv2 channels, as RyR clusters persist in CHNs exposed to  
477 treatments that disperse Kv2.1 clusters (Misonou et al., 2005b) and while reduced in size in CA1  
478 pyramidal neurons in the double Kv2.1/Kv2.2 knockout (Kirmiz et al., 2018a), in general RyR clusters

479 persist in neurons in the brains of mice lacking Kv2 channels (Mandikian et al., 2014; Kirmiz et al.,  
480 2018a). Further experiments are needed to determine the molecular mechanisms and direct protein-  
481 protein interactions that result in the spatial association of these proteins at neuronal EPJs.

482

### 483 **Kv2.1-dependent potentiation of Cav1.2 currents**

484         Given their prominent physiological role, the regulation of LTCCs is extensive and multimodal  
485 (Lipscombe et al., 2013; Hofmann et al., 2014; Neely and Hidalgo, 2014). The mechanisms involved in  
486 the modulation of LTCC function involve post-translational modification (*e.g.*, phosphorylation) or  
487 changes in the expression of the subunits (principal  $\alpha 1$ , and auxiliary Cav $\beta$  and  $\alpha 2\delta$ ) that together  
488 comprise the quaternary structure of an LTCC (Catterall, 2011; Zamponi et al., 2015). We have recently  
489 demonstrated a novel mechanism for regulating Cav1.2- (and Cav1.3-) containing LTCCs, whereby  
490 LTCCs function differently when clustered due to their clustering-dependent cooperative gating (Dixon et  
491 al., 2012; Dixon et al., 2015; Moreno et al., 2016). Thus, LTCC activity is sensitive to its spatial  
492 organization in the PM, influenced by its proximity to adjacent LTCCs (Navedo et al., 2005; Navedo et  
493 al., 2010; Dixon et al., 2012; Moreno et al., 2016) and also to its localization to specific neuronal  
494 compartments (Hall et al., 2013; Tseng et al., 2017). In neurons, such regulation likely acts to ensure that  
495 Cav1.2 is most active when properly targeted to specific subcellular domains and less active when outside  
496 these regions. Here, we show that the subcellular localization and activity of somatic Cav1.2 channels are  
497 influenced by Kv2.1, which increases both Cav1.2 clustering and its opening at polarized  $V_m$  values. At  
498 least two other proteins,  $\alpha$ -actinin (Hall et al., 2013) and densin-180 (Wang et al., 2017), exert a similar  
499 dual regulation on neuronal Cav1.2, by promoting its localization to dendritic spines and enhancing its  
500 activity at these sites. Neither of these proteins was identified in our proteomic analyses of proteins in  
501 close spatial proximity to Kv2.1, further suggesting that Cav1.2 complexes in dendritic spines and at  
502 somatic EPJs may be distinct. The reduced whole-cell LTCC currents and impaired association of somatic  
503 Cav1.2 with RyRs in Kv2.1 KO CHNs suggests that Kv2.1 serves this dual targeting/modulation function  
504 for LTCCs within the soma and proximal dendrites.

505 In both CHNs and HEK293T cells, currents resulting from the opening of endogenous and  
506 exogenous Cav1.2 channels, respectively, are increased in the presence of Kv2.1. In HEK293T cells,  
507 Cav1.2 channels coexpressed with clustered Kv2.1 are activated at more polarized  $V_m$  values relative to  
508 those produced by Cav1.2 alone. The Kv2.1-dependent increase in whole-cell Cav1.2 current amplitude  
509 in both cell types occurs without an apparent change in the number of Cav1.2 channels present on the PM,  
510 as total Cav1.2 on-gating charges were unaltered by coexpression with Kv2.1. Instead, it appears that  
511 coupling of Cav1.2 voltage sensor movement to channel opening is enhanced in the presence of Kv2.1.  
512 What is the molecular mechanism underlying this effect on Cav1.2 channel opening? We suggest three  
513 possibilities. First, the increase in  $I_{Ca}$  and leftward shift in the voltage-dependence of activation that we  
514 observed upon coexpression of Kv2.1 in HEK293T cells are similar to those observed during optogenetic  
515 induction of Cav1.2 channel oligomerization. Thus, one possible mechanism is that Kv2.1-induced  
516 clustering at EPJs increases the probability of physical interactions between Cav1.2 channels, which  
517 promotes their cooperative gating (Dixon et al., 2012; Navedo et al., 2010). A second possibility is that  
518 Kv2.1 functions as an auxiliary voltage sensor for Cav1.2 channels, perhaps through a direct  
519 intermolecular interaction of the two channels. However, the apparent localization of many Cav1.2  
520 clusters adjacent to rather than directly overlapping with Kv2.1 clusters in CHNs (e.g., see Fig. 1D-E)  
521 suggests that although these proteins associate in close spatial proximity, there may not be a direct  
522 interaction between individual Kv2.1 and Cav1.2 channels.

523 A third potential explanation for the Kv2.1-mediated increase in Cav1.2 channel activity is that  
524 Cav1.2 is modulated by signaling molecules recruited to EPJs by Kv2.1. It is well established that  
525 phosphorylation of Cav1.2 is a major mechanism to regulate its activity. Phosphorylation by protein  
526 kinase A (PKA) increases  $Ca^{2+}$  influx through Cav1.2, enhancing CICR (Dittmer et al., 2019). Another  
527 candidate which might impact Cav1.2 at EPJs is  $Ca^{2+}$ /calmodulin-dependent protein kinase II (CaMKII),  
528 which has also been shown to interact with Kv2.1 (McCord and Aizenman, 2013). Enhanced Cav1.2  
529 opening at polarized  $V_m$  values and increased open probability are produced by both PKA- (Tsien et al.,  
530 1986; Bers and Perez-Reyes, 1999) and CaMKII- (Erxleben et al., 2006; Blaich et al., 2010) dependent

531 phosphorylation of Cav1.2. Moreover, given the well-established association of RyRs with PKA and  
532 CaMKII (Zalk et al., 2007), it is conceivable that RyRs, Cav1.2, and Kv2.1 are substrates of these protein  
533 kinases at somatic EPJs. A recent study showed that in dendritic EPJs adjacent to spines, Cav1.2 is  
534 inhibited through a direct interaction with the ER-localized protein stromal interaction molecule 1  
535 (STIM1) in a negative feedback response to Cav1.2- and RyR-mediated CICR (Dittmer et al., 2019). As  
536 such the Kv2.1-mediated localization of Cav1.2 at EPJs may bring it in close proximity to numerous  
537 regulatory molecules, at least a subset of which may also be expressed in HEK293T cells in which we  
538 also observed prominent effects of Kv2.1 clustering on Cav1.2 activity.

539

#### 540 **Properties of Ca<sup>2+</sup> sparks at Kv2.1-associated EPJs**

541 The results presented here indicate that Ca<sup>2+</sup> sparks occurring at Kv2.1-associated EPJs were  
542 triggered primarily by Ca<sup>2+</sup> influx through LTCCs initiating the opening of juxtaposed RyRs.  
543 Accordingly, Ca<sup>2+</sup> spark frequency increased when neurons were exposed to Cav1.2 channel agonists and  
544 decreased by blockade of LTCCs. Indeed, loss of Kv2.1 expression was associated with a decrease in  
545 Ca<sup>2+</sup> spark frequency, likely because of decreased spatial association of Cav1.2 and RyRs, decreased RyR  
546 cluster size, and decreased LTCC currents.

547 Our findings indicate that Kv2.1-mediated somatodendritic EPJs provide a molecular platform to  
548 elevate local Ca<sup>2+</sup> at individual EPJs without an increase in global Ca<sup>2+</sup>, but that can also contribute to  
549 global, action potential-induced increases in cytoplasmic Ca<sup>2+</sup>. These results reinforce previous  
550 observations (Berrouit and Isokawa, 2009; Manita and Ross, 2009; Miyazaki et al., 2012; Miyazaki and  
551 Ross, 2013) that hippocampal neurons possess the molecular machinery to produce spontaneous local  
552 elevations in somatodendritic Ca<sup>2+</sup> that could potentially impact a wide variety of signaling pathways.  
553 That sparks can occur independently in neighboring Kv2.1-containing EPJs suggests a mechanism for  
554 compartmentalized Ca<sup>2+</sup> signaling in the aspiny regions of neurons (somata, proximal dendrites, axon  
555 initial segment) in which Kv2.1 clusters are located. One specific role identified for Ca<sup>2+</sup> signals produced  
556 by somatic RyR receptors at EPJs is in cartwheel cells (inhibitory interneurons found in the dorsal

557 cochlear nucleus), where they trigger rapid gating of BK  $\text{Ca}^{2+}$ -activated  $\text{K}^+$  channels to control electrical  
558 excitability (Irie and Trussell, 2017). While this mode of BK channel activation has not been observed in  
559 CA1 pyramidal neurons (Ross, 2012), sparks at Kv2.1-associated EPJs might influence electrical activity  
560 in pyramidal cells through  $\text{Ca}^{2+}$ -sensitive enzymes that modify ion channel function, such as protein  
561 kinases and phosphatases that influence their phosphorylation state (Misonou et al., 2004).  
562 In addition, a role for somatic  $\text{Ca}^{2+}$  sparks has been identified in DRG neurons, where they promote non-  
563 synaptic exocytosis of ATP-loaded secretory vesicles (Ouyang et al., 2005). Whether  $\text{Ca}^{2+}$  entry mediated  
564 by LTCCs and RyRs at Kv2.1-associated EPJs impacts secretory vesicle exocytosis in brain neurons will  
565 need to be investigated in future studies.

566

#### 567 **Potential impact on downstream signaling pathways**

568 Somatodendritic LTCCs are preferentially coupled to activation of signaling pathways resulting  
569 in changes in gene expression (Wheeler et al., 2012; Wild et al., 2019). In sympathetic neurons, local  $\text{Ca}^{2+}$   
570 influx through LTCCs rather than bulk elevation of intracellular  $\text{Ca}^{2+}$  efficiently activates the transcription  
571 factor cAMP response element-binding protein (CREB) (Wheeler et al., 2008) through a mechanism that  
572 involves a signaling complex containing components of a PM-to-nucleus  $\text{Ca}^{2+}$  shuttle (Ma et al., 2012;  
573 Ma et al., 2014; Cohen et al., 2015). Moreover, somatic LTCCs play a unique role in the  $\text{Ca}^{2+}$  influx that  
574 leads to activation of the NFAT transcription factor (Wild et al., 2019). The results presented here suggest  
575 that Kv2.1-mediated organization and regulation of somatic LTCCs provides a molecular mechanism to  
576 control local  $\text{Ca}^{2+}$  influx and serve as an organizer of  $\text{Ca}^{2+}$  signaling microdomains. Previous work from  
577 us (Misonou et al., 2004; Misonou et al., 2005a) and others (Mulholland et al., 2008; Aras et al., 2009)  
578 has shown that acute ischemic or depolarizing events disperse Kv2.1 clusters and polarize its  $V_m$   
579 activation threshold, potentially as a homeostatic mechanism to reduce neuronal activity and  $\text{Ca}^{2+}$   
580 overload that can lead to excitotoxicity. In our experiments here, we determined that Kv2.1-mediated  
581 clustering was associated with enhanced functional coupling of Cav1.2 and RyRs, as well as increased  
582 activation of Cav1.2 at polarized  $V_m$  values. Therefore, dispersal of Kv2.1 clusters and the resulting



583 dissociation of Cav1.2 and RyRs may represent a negative feedback loop to limit excessive increases in  
584 cytoplasmic  $\text{Ca}^{2+}$ . By decreasing LTCC- and RyR-mediated CICR, dispersal of Kv2.1 clusters may help  
585 to curb excessive accumulation of intracellular  $\text{Ca}^{2+}$ , which inappropriately activates signaling pathways  
586 contributing to neuronal damage or death (Dirnagl et al., 1999). Activity-dependent declustering of Kv2.1  
587 may also help to reduce currents conducted by LTCCs, both through increased activation of  
588 hyperpolarizing Kv2.1 currents at polarized  $V_m$  (opposing activation of voltage-gated  $\text{Ca}^{2+}$  channels) and  
589 also through limiting Cav1.2 activity by altering its spatial organization in the PM. Our findings may also  
590 contribute to an understanding of the pathogenic mechanisms underlying mutations in Kv2.1 predicted to  
591 selectively disrupt the PRC domain required for Kv2.1 clustering (de Kovel et al., 2017).

592 Overall, the findings presented here identify a molecular structure underlying the spontaneous  
593 somatodendritic  $\text{Ca}^{2+}$  signals previously observed in hippocampal pyramidal neurons. While our live cell  
594 experiments were primarily confined to CHNs cultured for 9-15 days *in vitro*, our data indicate that the  
595 spatial association of Kv2.1, Cav1.2, and RyRs is preserved in intact adult mouse and rat brains and can  
596 be recapitulated in heterologous cells. Moreover, somatodendritic  $\text{Ca}^{2+}$  sparks have been observed in  
597 acute hippocampal slices obtained from rats aged P3-P80 (Miyazaki et al., 2012), suggesting that these  
598  $\text{Ca}^{2+}$  release events serve functional roles that emerge early in pyramidal neuron development and  
599 continue beyond this period. Although it is unclear whether spontaneous  $\text{Ca}^{2+}$  sparks serve a specific  
600 function at their site of generation, or if they instead reflect stochastic events whose primary impact lies in  
601 their group behavior (i.e., through modulation of bulk cytosolic  $\text{Ca}^{2+}$ ), the results described here have  
602 relevance to obtaining a better understanding of their generation as well as their downstream effects.

603

## 604 **Materials and Methods**

605 Animals. All procedures involving rats and mice were approved by the University of California, Davis  
606 Institutional Animal Care and Use Committee and performed in accordance with the NIH Guide for the  
607 Care and Use of Laboratory Animals. Animals were maintained under standard light-dark cycles and  
608 allowed to feed and drink ad libitum. Sprague-Dawley rats were used for immunolabeling experiments

609 and as a source of hippocampal neurons for primary culture. Kv2.1 KO mice  
 610 (RRID:IMSR\_MGI:3806050) (Jacobson et al., 2007; Speca et al., 2014) were generated from breeding of  
 611 *Kcnbl<sup>+/-</sup>* mice that had been backcrossed on the C57/BL6J background (RRID:IMSR\_JAX:000664).  
 612 Littermates were used when available. Adult male (mice and rats) and female (rats) were used in  
 613 immunohistochemistry experiments; adult male and female mice were used in proteomics. Experiments  
 614 using CHNs were performed using neuronal cultures obtained from pooling neurons from animals of both  
 615 sexes (rats and mice) and also cultures in which individual pups were grouped by sex after visual  
 616 inspection (mice).

617

618 Antibodies.

619 **Table 4. Antibody information**

| <b>Antigen and antibody name</b> | <b>Immunogen</b>                             | <b>Manufacturer information</b>                                             | <b>Concentration used</b>        | <b>Figures</b>          |
|----------------------------------|----------------------------------------------|-----------------------------------------------------------------------------|----------------------------------|-------------------------|
| <b>PSD-95 (K28/43)</b>           | Fusion protein aa 77-299 of human PSD-95     | Mouse IgG2a mAb, NeuroMab, RRID:AB_10807979                                 | Tissue culture supernatant (1:5) | 1                       |
| <b>Cav1.2 (N263/31)</b>          | Fusion protein aa 808-874 of rat Cav1.2      | Mouse IgG2b mAb, NeuroMab, RRID:AB_11001554                                 | Tissue culture supernatant (1:5) | 1, 5, 8, S1             |
| <b>Cav1.2 (L57/23)</b>           | Fusion protein aa 1507-1733 of rabbit Cav1.2 | Mouse IgG2a mAb, In-house (Trimmer Laboratory) RRID:AB_2802123              | Tissue culture supernatant, neat | 1                       |
| <b>Cav1.3 (ACC-005)</b>          | Synthetic peptide aa 859-875 of rat Cav1.3   | Rabbit pAb, Alomone catalog # ACC-005, RRID:AB_2039775                      | Affinity purified, 10 µg/mL      | 1                       |
| <b>Kv2.1 (KC)</b>                | Synthetic peptide aa 837-853 of rat Kv2.1    | Rabbit pAb, In-house (Trimmer Laboratory), RRID:AB_2315767                  | Affinity purified, 1:100         | 1 (immunopurifications) |
| <b>Kv2.1 (K89/34R)</b>           | Synthetic peptide aa 837-853 of rat Kv2.1    | Recombinant mouse IgG2a mAb, In-house (Trimmer Laboratory), RRID:AB_2750677 | Tissue culture supernatant (1:5) | 1, 3, 5, 8              |
| <b>Kv2.1 (K39/25R)</b>           | Synthetic peptide aa 211-                    | Recombinant mouse IgG2a mAb, In-house                                       | Tissue culture supernatant (1:5) | 2                       |

|                               |                                                                          |                                                                                 |                                                  |               |
|-------------------------------|--------------------------------------------------------------------------|---------------------------------------------------------------------------------|--------------------------------------------------|---------------|
|                               | 229 of human Kv2.1                                                       | (Trimmer Laboratory),<br>RRID:AB_2750663                                        |                                                  |               |
| <b>MAP2 (AB5622-I)</b>        | KLH-conjugated three peptides from N- and C-terminal regions of rat MAP2 | Rabbit pAb, Millipore catalog # AB5622-I, RRID: AB_2800501                      | Affinity purified, 1:1000                        | 1, 3, 4       |
| <b>RyRs (34C)</b>             | Partially purified chicken pectoral muscle ryanodine receptor            | Mouse IgG1 mAb, Developmental Studies Hybridoma RRID:AB_528457                  | Concentrated tissue culture supernatant, 3 µg/ml | 1, 3, 4, 5, 8 |
| <b>Cav3.1 (N178A/9)</b>       | Fusion protein aa 2052-2172 of mouse Cav3.1                              | Mouse IgG1 mAb, NeuroMab, RRID:AB_10673097                                      | Tissue culture supernatant (1:5)                 | 2             |
| <b>Kv1.5 (Kv1.5e)</b>         | Synthetic peptide aa 271-284 of rat Kv1.5                                | Rabbit pAb, in-house (Trimmer Laboratory), RRID:AB_2722698                      | Affinity purified, 5 µg /ml                      | 2             |
| <b>Kv2.2 (Kv2.2C)</b>         | Fusion protein aa 717-907 of rat Kv2.2                                   | Rabbit pAb, in-house (Trimmer Laboratory), RRID:AB_2801484                      | Affinity purified, 1:100                         | 8, S1         |
| <b>Kv4.2 (K57/41)</b>         | Synthetic peptide aa 209-225 of human Kv4.2                              | Mouse IgG1 mAb, In-house (Trimmer Laboratory), RRID:AB_2802124                  | Affinity purified, 10 µg /ml                     | 8             |
| <b>Anti-HA (2-2.2.14-647)</b> | HA peptide YPYDVPDYA                                                     | Mouse IgG1 mAb, Thermo Fisher Scientific catalog # 26183-A647, RRID: AB_2610626 | Affinity purified, 1 µg /ml                      | 2             |

620

621 Hippocampal neuron cultures. Neuronal cultures were prepared and maintained as previously described  
622 (Kirmiz et al., 2018a; Kirmiz et al., 2018b). Hippocampi were dissected from either postnatal day 0-1  
623 pups (mice) following genotyping or embryonic day 18 embryos (rat) and dissociated enzymatically for  
624 20 min at 37 °C in HBSS supplemented with 0.25% (w/v) trypsin (Worthington Cat# LS003707),  
625 followed by mechanical dissociation via trituration with fire-polished glass Pasteur pipettes. Dissociated  
626 cells were suspended in plating medium containing Neurobasal (ThermoFisher Cat# 21103049)  
627 supplemented with 10% fetal bovine serum (FBS, Invitrogen Cat# 16140071), 2% B27 supplement  
628 (Invitrogen Cat# 17504044), 2% GlutaMAX (ThermoFisher Cat# 35050061), and 0.001% gentamycin  
629 (Gibco Cat# 15710064) and plated at 60,000 cells per dish in glass bottom dishes (MatTek Cat# P35G-

630 1.5-14-C) or on microscope cover glasses (Karl Hecht Assistent Ref# 92099005050) coated with poly-L-  
631 lysine (Sigma Cat# P2636). After 5 days in vitro (DIV), cytosine-D-arabinofuranoside (Millipore Cat#  
632 251010) was added to inhibit non-neuronal cell growth. Neurons were transiently transfected at DIV 7-10  
633 using Lipofectamine 2000 (Invitrogen Cat# 11668019) for 1.5 hours as previously described (Lim et al.,  
634 2000). Neurons were used for experiments 40-48 hours post transfection.

635 For glutamate-induced dispersal of Kv2.1 in rat CHNs, 20-24 DIV neurons cultured on  
636 microscope cover glasses were incubated in 1 mL of a modified Krebs-Ringer buffer (KRB) containing  
637 (in mM): 146 NaCl, 4.7 KCl, 2.5 CaCl<sub>2</sub>, 0.6 MgSO<sub>4</sub>, 1.6 NaHCO<sub>3</sub>, 0.15 NaH<sub>2</sub>PO<sub>4</sub>, 8 glucose, 20 HEPES,  
638 pH 7.4, approximately 330 mOsm for 30 minutes at 37 °C. We then added an additional 1 mL of KRB  
639 prewarmed to 37 °C, with or without 20 µM glutamate (Calbiochem Cat #3510) for a final glutamate  
640 concentration of 10 µM, and incubated CHNs for 10 minutes at 37 °C. We then proceeded immediately to  
641 fixation.

642  
643 HEK293T cell culture. HEK293T cells (ATCC Cat# CRL-3216) were maintained in Dulbecco's modified  
644 Eagle's medium (Gibco Cat# 11995065) supplemented with 10% Fetal Clone III (HyClone Cat#  
645 SH30109.03), 1% penicillin/streptomycin, and 1x GlutaMAX (ThermoFisher Cat# 35050061) in a  
646 humidified incubator at 37 °C and 5% CO<sub>2</sub>. Cells were transiently transfected using Lipofectamine 2000  
647 following the manufacturer's protocol, in DMEM without supplements, then returned to regular growth  
648 medium 4 hours after transfection. 20-24 hours later, cells were passaged to obtain single cells on glass  
649 bottom dishes (MatTek Cat# P35G-1.5-14-C) or microscope cover glasses (VWR Cat# 48366-227)  
650 coated with poly-L lysine. Cells were then used for experiments approximately 15 hours after being  
651 passaged.

652  
653 Immunolabeling of cells. Immunolabeling of CHNs and HEK293T cells was performed as described  
654 previously (Kirmiz et al., 2018b). CHNs were fixed in ice cold 4% (wt/vol) formaldehyde (freshly  
655 prepared from paraformaldehyde, Fisher Cat# O4042) in phosphate buffered saline (PBS, Sigma Cat

656 #P3813), pH 7.4, for 15 minutes at 4 °C. HEK293T cells were fixed in 3.2% formaldehyde (freshly  
657 prepared from paraformaldehyde) and 0.1% glutaraldehyde (Ted Pella, Inc., Cat# 18426) prepared in PBS  
658 pH 7.4, for 20 minutes at room temperature (RT), washed 3 x 5 min in PBS and quenched with 1%  
659 sodium borohydride (Sigma Cat# 452882) in PBS for 15 minutes at room temperature. All subsequent  
660 steps were performed at RT. Cells were then washed 3 x 5 minutes in PBS, followed by blocking in  
661 blotto-T (Tris-buffered saline [10 mM Tris, 150 mM NaCl, pH 7.4] supplemented with 4% (w/v) non-fat  
662 milk powder and 0.1 % (v/v) Triton-X100 [Roche Cat# 10789704001]) for 1 hour. Cells were  
663 immunolabeled for 1 hour with primary antibodies diluted in blotto-T (concentrations used for primary  
664 antibodies listed in Table 4). Following 3 x 5 minute washes in blotto-T, cells were incubated with mouse  
665 IgG subclass- and/or species-specific Alexa-conjugated fluorescent secondary antibodies (Invitrogen)  
666 diluted in blotto-T for 45 min, then washed 3 x 5 minutes in PBS. Cover glasses were mounted on  
667 microscope slides with Prolong Gold mounting medium (ThermoFisher Cat # P36930) according to the  
668 manufacturer's instructions. For surface immunolabeling of HEK293T cells, cells were fixed for 20  
669 minutes at 4 °C in ice-cold 3.2% formaldehyde prepared in PBS, pH 7.4. All subsequent steps were  
670 performed at RT without Triton X-100. Cells were washed 3 x 10 minutes in PBS, blocked for 1 h in  
671 blotto-T, then incubated for 2 hours in primary antibodies diluted in blotto-T without Triton X-100. Cells  
672 were then washed 3 x 15 minutes in blotto-T, then incubated with mouse IgG subclass- and/or species-  
673 specific Alexa-conjugated fluorescent secondary antibodies diluted in blotto-T for 1.5 hours. Cells were  
674 washed 3 x 15 minutes in PBS, then mounted onto microscope slides as described above.

675         Widefield fluorescence images were acquired with an AxioCam MRm digital camera installed on  
676 a Zeiss AxioImager M2 microscope or with an AxioCam HRm digital camera installed on a Zeiss  
677 AxioObserver Z1 microscope with a 63X/1.40 NA plan-Apochromat oil immersion objective and an  
678 ApoTome coupled to Axiovision software (Zeiss, Oberkochen, Germany). Confocal images were  
679 acquired using a Zeiss LSM880 confocal laser scanning microscope equipped with an Airyscan detection  
680 unit and a Plan-Apochromat 63x/1.40 NA Oil DIC M27 objective. Structured illumination microscopy  
681 (N-SIM) images were acquired with a Hamamatsu ORCA-ERCCD camera on a SIM/wide-field capable

682 Nikon Eclipse Ti microscope with an EXFO X-Cite metal halide light source and a 100X PlanApo  
683 TIRF/1.49 objective. Colocalization and morphological analyses of Cav1.2 and RyRs in CHNs was  
684 performed using FIJI (NIH). For the colocalization analyses, an ROI was drawn around the soma of a  
685 neuron and PCC values were collected using the Coloc2 plugin. All intensity measurements were  
686 collected using FIJI. All intensity measurements reported in line scans are normalized to the maximum  
687 intensity measurement. Measurements of cluster sizes was performed essentially as previously described  
688 (Kirmiz et al., 2018a; Kirmiz et al., 2018b). Images were subjected to rolling ball background subtraction  
689 and subsequently converted into a binary mask by thresholding. Cluster sizes were measured using the  
690 “analyze particles” feature of FIJI; nearest neighbor distances were calculated from cluster centroid  
691 values using the nearest neighbor distance plugin in FIJI. For presentation, images were exported as  
692 TIFFs and linearly scaled for min/max intensity and flattened as RGB TIFFs in Photoshop (Adobe).

693  
694 Immunolabeling of brain sections. Following administration of pentobarbital to induce deep anesthesia,  
695 animals were transcardially perfused with 4% formaldehyde (freshly prepared from paraformaldehyde) in  
696 0.1 M sodium phosphate buffer pH 7.4 (0.1 M PB). Sagittal brain sections (30  $\mu$ m thick) were prepared  
697 and immunolabeled using free-floating methods as detailed previously (Rhodes et al., 2004; Specia et al.,  
698 2014; Bishop et al., 2015; Palacio et al., 2017). Sections were permeabilized and blocked in 0.1 M PB  
699 containing 10% goat serum and 0.3% Triton X-100 (vehicle) for 1 hour at RT, then incubated overnight at  
700 4°C in primary antibodies (Table 4) diluted in vehicle. After 4 x 5 minute washes in 0.1 M PB, sections  
701 were incubated with mouse IgG subclass- and/or species-specific Alexa-conjugated fluorescent secondary  
702 antibodies (Invitrogen) and Hoechst 33258 DNA stain diluted in vehicle at RT for 1 hour. After 2 x 5  
703 minute washes in 0.1 M PB followed by a single 5 minute wash in 0.05 M PB, sections were mounted and  
704 air dried onto gelatin-coated microscope slides, treated with 0.05% Sudan Black (EM Sciences) in 70%  
705 ethanol for 2 minutes (Schnell et al., 1999). Samples were then washed extensively in water and mounted  
706 with Prolong Gold (ThermoFisher Cat # P36930). Images of brain sections were taken using the same

707 exposure time to compare the signal intensity directly using an AxioCam HRm high-resolution CCD  
708 camera installed on an AxioObserver Z1 microscope with a 10x/0.5 NA lens, and an ApoTome coupled to  
709 Axiovision software, version 4.8.2.0 (Zeiss, Oberkochen, Germany). Labeling intensity within stratum  
710 pyramidale and stratum radiatum of hippocampal area CA1 was measured using a rectangular region of  
711 interest (ROI) of approximately 35  $\mu\text{m}$  x 185  $\mu\text{m}$ . Labeling intensity within stratum granulosum and the  
712 inner third of stratum moleculare of the dentate gyrus (DG) was measured using a rectangular ROI of  
713 approximately 48  $\mu\text{m}$  x 200  $\mu\text{m}$ . To maintain consistency between samples, the average pixel intensity  
714 values of ROIs from CA1 were acquired near the border of CA1 and CA2, and those from DG were  
715 obtained near the center of the dorsal/suprapyramidal blade of the DG. Signal intensity values from all  
716 immunolabels and of Hoechst dye were measured from the same ROI. Background levels for individual  
717 labels were measured from no primary controls for each animal and subtracted from ROI values. High  
718 magnification confocal images of rat and mouse hippocampus were acquired using a Zeiss LSM880  
719 confocal laser scanning microscope equipped with an Airyscan detection unit and a Plan-Apochromat  
720 63x/1.40 NA Oil DIC M27 objective.

721  
722 Immunopurification of Kv2.1 and proteomics. Crosslinked mouse brain samples for immunopurification  
723 were prepared as previously described (Kirmiz et al., 2018b). Individual excised brains from three wild-  
724 type and three Kv2.1 KO mouse littermates were homogenized separately over ice in a Dounce  
725 homogenizer containing 5 mL homogenization and crosslinking buffer (in mM): 320 sucrose, 5 NaPO<sub>4</sub>,  
726 pH 7.4, supplemented with 100 NaF, 1 PMSF, protease inhibitors, and 1 DSP (Lomant's reagent,  
727 ThermoFisher Cat# 22585). Following a 1 hour incubation on ice, DSP was quenched with 20 mM Tris,  
728 pH 7.4 (JT Baker Cat# 4109-01 [Tris base]; and 4103-01 [Tris-HCl]). 2 mL of each homogenate was then  
729 added to an equal volume of ice-cold 2x radioimmunoprecipitation assay (RIPA) buffer (final  
730 concentrations): 1% (vol/vol) TX-100, 0.5% (wt/vol) deoxycholate, 0.1% (wt/vol) SDS, 150 NaCl, 50  
731 Tris, pH 8.0 and incubated on a tube rotator at 4 °C for 30 minutes. Insoluble material was then pelleted  
732 by centrifugation at 12,000  $\times$  g for 10 minutes at 4 °C. The supernatants from the six brains were

733 incubated overnight at 4 °C with the anti-Kv2.1 rabbit polyclonal antibody KC (Trimmer, 1991).  
734 Following this incubation, we added 100 µL of magnetic protein G beads (ThermoFisher Cat# 10004D)  
735 and incubated the samples on a tube rotator at 4 °C for 1 h. Beads were then washed 6x following capture  
736 on a magnet in ice-cold 1x RIPA buffer, followed by four washes in 50 mM ammonium bicarbonate (pH  
737 7.4). Proteins captured on magnetic beads were digested with 1.5 mg/mL trypsin (Promega Cat# V5111)  
738 in 50 mM ammonium bicarbonate overnight at 37 °C. The eluate was then lyophilized and resuspended in  
739 0.1% trifluoroacetic acid in 60% acetonitrile.

740 Proteomic profiling was performed at the University of California, Davis Proteomics Facility.  
741 Tryptic peptide fragments were analyzed by LC-MS/MS on a Thermo Scientific Q Exactive Plus Orbitrap  
742 Mass spectrometer in conjunction with a Proxeon Easy-nLC II HPLC (Thermo Scientific) and Proxeon  
743 nanospray source. Digested peptides were loaded onto a 100 µm x 25 mm Magic C18 100Å 5U reverse  
744 phase trap where they were desalted online, then separated using a 75 µm x 150 mm Magic C18 200Å 3U  
745 reverse phase column. Peptides were eluted using a 60-minute gradient at a flow rate of 300 nL per min.  
746 An MS survey scan was obtained for the  $m/z$  range 350-1600; tandem MS spectra were acquired using a  
747 top 15 method, where the top 15 ions in the MS spectrum were subjected to HCD (High Energy  
748 Collisional Dissociation). Precursor ion selection was performed using a mass window of 1.6  $m/z$ , and  
749 normalized collision energy of 27% was used for fragmentation. A 15 s duration was used for the  
750 dynamic exclusion. MS/MS spectra were extracted and charge state deconvoluted by Proteome  
751 Discoverer (Thermo Scientific). MS/MS samples were then analyzed using X! Tandem (The GPM,  
752 [theGPM.org](http://theGPM.org); version Alanine (2017. 2. 1.4)). X! Tandem compared acquired spectra against the UniProt  
753 Mouse database (May 2017, 103089 entries), the cRAP database of common proteomic contaminants  
754 ([www.theGPM.org/crap](http://www.theGPM.org/crap); 114 entries), the ADAR2 catalytic domain sequence, plus an equal number of  
755 reverse protein sequences assuming the digestion enzyme trypsin. X! Tandem was searched with a  
756 fragment ion mass tolerance of 20 ppm and a parent ion tolerance of 20 ppm. Variable modifications  
757 specified in X! Tandem included deamidation of asparagine and glutamine, oxidation of methionine and  
758 tryptophan, sulfone of methionine, tryptophan oxidation to formylkynurenin of tryptophan and acetylation



759 of the N-terminus. Scaffold (version Scaffold\_4.8.4, Proteome Software Inc., Portland, OR) was used to  
760 validate tandem MS-based peptide and protein identifications. X! Tandem identifications were accepted if  
761 they possessed -Log (Expect Scores) scores of greater than 2.0 with a mass accuracy of 5 ppm. Protein  
762 identifications were accepted if they contained at least two identified peptides. The threshold for peptide  
763 acceptance was greater than 95% probability. After filtering for proteins present in the wild-type brain  
764 samples and absent in the KO brain samples, proteins in the wild-type sample were ranked by spectral  
765 counts. To generate the data in Table 2, spectral counts for the individual proteins in the three separate IPs  
766 were then normalized to the spectral counts for Kv2.1 (set at 100).

767  
768 Plasmid constructs. To maintain consistency with previous studies, we use the original (Frech et al., 1989)  
769 amino acid numbering of rat Kv2.1 (accession number NP\_037318.1). The generation of DsRed-Kv2.1  
770 and -Kv2.2 plasmids has been described previously (Kirmiz et al., 2018b). GCaMP3-Kv2.1 was generated  
771 using Gibson assembly to insert GCaMP3 (Tian et al., 2009) into the Kv2.1 RBG4 vector (Shi et al.,  
772 1994), resulting in fusion of GCaMP3 to the N-terminus of full-length rat Kv2.1. The plasmid encoding  
773 Kv2.1<sub>S586A</sub> has been previously described (Lim et al., 2000); the plasmid encoding Kv2.1<sub>P404W</sub> in the  
774 pcDNA4/TO vector was a gift from Dr. Jon Sack (University of California, Davis). The plasmid encoding  
775 Kv1.5 has been previously described (Nakahira et al., 1996). The plasmids encoding GFP-tagged full-  
776 length rabbit Cav1.2  $\alpha 1$  subunit (accession number NP\_001129994.1) and GFP-tagged short isoform of  
777 rat Cav1.3  $\alpha$  subunit (accession AAK72959.1) have been previously described (Dixon et al., 2015;  
778 Moreno et al., 2016). Plasmids encoding untagged full-length mouse Cav1.2, rat Cav $\beta 3$ , and rat  $\alpha 2\delta 1$  were  
779 gifts of Dr. Diane Lipscombe (Brown University). The plasmid encoding BFP-Sec61 $\beta$  was a gift from Dr.  
780 Jodi Nunnari (University of California, Davis). Plasmid encoding HA-tagged rat Cav1.2 was a gift from  
781 Dr. Valentina Di Biase (Medical University of Graz), plasmid encoding human Cav3.1 was a gift from  
782 Dr. Edward Perez-Reyes (University of Virginia), and plasmid encoding full-length mouse RyR2 fused  
783 with YFP was a gift of Dr. Alla Fomina (University of California, Davis). The vector encoding human  
784 STAC1 was obtained from DNASU (DNASU plasmid # HsCD00445396).

785  
786 Live cell imaging. HEK293T cells transfected with RyR2-YFP, LTCC  $\alpha 1$  subunit (Cav1.2 or Cav1.3(s)),  
787 Cav $\beta 3$ , Cav $\alpha 2\delta 1$ , STAC1, and empty vector control (pcDNA3) or DsRed-Kv2.1<sub>P404W</sub> plasmids in a  
788 1.5:1:0.5:0.5:0.25:1 ratio were seeded to glass bottom dishes (MatTek Cat# P35G-1.5-14-C)  
789 approximately 15 hours prior to recording. Total internal reflection fluorescence (TIRF) and widefield  
790 microscopy imaging of HEK293T cells and DIV9-10 (transfected with GCaMP3-Kv2.1) or DIV14-21  
791 (loaded with Cal-590 AM) CHNs cultured on glass-bottom dishes was performed in KRB at 37 °C as  
792 previously described (Kirmiz et al., 2018b). For imaging of cells loaded with Ca<sup>2+</sup>-sensitive dye, cells  
793 were first incubated in regular culture medium to which had been added 1.5  $\mu$ M Cal-590 AM (AAT  
794 Bioquest Cat# 20510) for 45 minutes or Fluo-4 AM (Invitrogen Cat# F14201) for 25 minutes at 37 °C.  
795 Dye-containing medium was then aspirated, followed by two washes in KRB which had been warmed to  
796 37 °C. Cells were then incubated in KRB for an additional 30 minutes at 37 °C prior to imaging. Caffeine  
797 (Sigma Cat# C0750), thapsigargin (Millipore Cat# 586005), nimodipine (Alomone Cat# N-150), Bay  
798 K8644 (Alomone Cat# B-350), and tetracaine (Sigma Cat# T7508) were dissolved in warm KRB at 2x  
799 the final concentration and added to cells during imaging by a pipette. Images were acquired on a Nikon  
800 Eclipse Ti TIRF/widefield microscope equipped with an Andor iXon EMCCD camera and a Nikon LUA4  
801 laser launch with 405, 488, 561, and 647 nm lasers, using a 100x/1.49 NA PlanApo TIRF objective and  
802 NIS Elements software. For *post-hoc* immunolabeling of CHNs, the dish orientation and location of the  
803 imaged cell was recorded, after which the CHN was fixed in ice-cold 4% formaldehyde and processed for  
804 immunolabeling as described above. Recorded CHNs were identified on the basis of expression of  
805 GCaMP3-Kv2.1 and/or neurite morphology revealed by immunolabeling for MAP2.

806  
807 Electrophysiology. HEK293T cells transfected with Cav1.2-GFP, Cav $\beta 3$ , Cav $\alpha 2\delta 1$ , and empty vector  
808 control (pcDNA3) or DsRed-Kv2.1<sub>P404W</sub> plasmids in a 1:0.5:0.5:1 ratio were seeded to microscope cover  
809 glasses (Fisher Cat# 12-545-102) approximately 15 hours prior to recording to obtain single cells.  
810 Coexpression of Cav1.2 and Kv2.1<sub>P404W</sub> in HEK293T cells was apparently cytotoxic and thus necessitated

811 seeding of cells at a higher density to obtain viable single cells as compared to control cells expressing  
812 Cav1.2 alone. HEK293T cells were patched in an external solution of modified Krebs-Ringer buffer  
813 (KRB) containing (in mM): 146 NaCl, 4.7 KCl, 2.5 CaCl<sub>2</sub>, 0.6 MgSO<sub>4</sub>, 1.6 NaHCO<sub>3</sub>, 0.15 NaH<sub>2</sub>PO<sub>4</sub>, 8  
814 glucose, 20 HEPES, pH 7.4, approximately 330 mOsm. Transfected cells were identified by the presence  
815 of GFP and DsRed expression.  $I_{Ca}$  was recorded in transfected cells using the whole-cell voltage clamp  
816 patch configuration using fire-polished borosilicate pipettes that had resistances of 2-3 M $\Omega$  when filled  
817 with an internal solution containing (in mM): 125 Cs-methanesulfonate, 10 TEA-Cl, 1 MgCl<sub>2</sub>, 0.3 Na<sub>2</sub>-  
818 GTP, 13 phosphocreatine-(di)Tris, 5 Mg·ATP, 5 EGTA, 10 HEPES, adjusted to pH 7.22 with CsOH,  
819 approximately 320 mOsm. Currents were sampled at 20 kHz and low-pass-filtered at 2 kHz using an  
820 Axopatch 200B amplifier, and acquired using pClamp 10.2 software (Molecular Devices, Sunnyvale,  
821 CA). All experiments were performed at room temperature (22–25 °C). Pipette capacitance was  
822 compensated using the amplifier, and capacitance and ohmic leak were subtracted online using a P/5  
823 protocol. Current–voltage ( $I$ – $V$ ) relationships were obtained approximately three minutes after obtaining  
824 the whole-cell configuration by subjecting cells to a series of 300-ms depolarizing pulses from the  
825 holding potential of -70 mV to test potentials ranging from -60 to +100 mV in 10 mV increments. The  
826 voltage dependence of  $G/G_{max}$  was obtained from the recorded currents by converting them to  
827 conductances ( $G$ ) using the equation  $G = I_{Ca}/(\text{test pulse potential} - E_{rev(Ca)})$ , plotting the normalized values  
828 ( $G/G_{max}$ ) versus the test potential, and fitting them to a Boltzmann function. Steady-state inactivation was  
829 measured by subjecting cells to a series of 2500-ms conditioning prepulses from the holding potential to  
830 potentials ranging from -60 to +100 mV, returning to the -70 mV holding potential for 5 ms, then  
831 measuring the peak current elicited by a 300 ms step to the -20 mV test potential. Data was analyzed and  
832 plotted using Prism software (Graphpad Software Inc., San Diego, CA). For experiments in which  
833 depolarization-induced increases in Ca<sup>2+</sup>-sensitive dye were measured, we included 0.2 mM Rhod-2  
834 (AAT Bioquest Cat# 21068) in the patch pipette solution. Images were acquired at 10 Hz using a through-  
835 the-lens TIRF microscope built around an Olympus IX-70 inverted microscope equipped with an oil-

836 immersion ApoN 60x/1.49 NA TIRF objective and an Andor iXON CCD camera using TILLvisION  
837 imaging software (TILL Photonics, FEI, Hillsboro, OR).

838 To measure gating and ionic tail currents, we first determined the reversal potential for  $I_{Ca}$  from  
839 the  $I-V$  relationship obtained using the  $I-V$  protocol described above. Gating currents were then measured  
840 by applying a series of depolarizing steps from the holding potential (-70 mV) to potentials  $\pm 5$  mV of the  
841 reversal potential in 1 mV increments. Currents were sampled at a frequency of 25 kHz and low-pass  
842 filtered at 2 kHz. We first obtained recordings in cells perfused with KRB alone, then obtained recordings  
843 from the same cell after it had been perfused for two minutes with KRB containing 1  $\mu$ M nitrendipine  
844 (Alomone Cat# N-155). To isolate gating currents and  $I_{tail}$  produced by Cav1.2, we subtracted currents  
845 measured in the presence of nitrendipine from those measured in KRB alone. The on-gating charge ( $Q_{on}$ )  
846 was then obtained from these records by integrating the gating current within approximately 2 ms of a  
847 depolarizing step to the reversal potential, and maximal  $I_{tail}$  amplitudes were measured upon  
848 repolarization to the holding potential.

849 Somatic whole-cell patch clamp recordings were acquired from WT and Kv2.1 KO mouse CHNs  
850 cultured on microscope cover glasses after 15-16 DIV. Pyramidal neurons were selected based upon their  
851 morphological characteristics (Benson et al., 1994). Patch pipettes were fashioned and filled with  
852 intracellular recording solution as described above. After establishing the whole-cell configuration in  
853 KRB, the bath solution was exchanged with an extracellular recording buffer containing (in mM): 135  
854 NMDG, 30 TEA-Cl, 5 BaCl<sub>2</sub>, 8 glucose, 20 HEPES, adjusted to pH7.4 with HCl. Series resistance was  
855 9.9 $\pm$ 0.9 (WT) and 10.4 $\pm$ 0.9 (Kv2.1 KO) M $\Omega$  ( $p=0.694$ , Student's  $t$ -test) (before compensation); cell  
856 capacitance was 52.9 $\pm$ 4.8 (WT) and 58.4 $\pm$ 4.0 (Kv2.1 KO) pF ( $p=0.789$ , Student's  $t$ -test). Prior to  
857 recording, cell capacitance was canceled, and series resistance was partially (60-70%) compensated.  
858 Recordings of LTCC ionic and gating currents were then performed as described for HEK293T cells. We  
859 used 10  $\mu$ M nimodipine to isolate the contribution of LTCCs to the measured currents.

860 For simultaneous measurement of the  $V_m$  and Ca<sup>2+</sup> sparks, rat CHNs transfected with GCaMP3-  
861 Kv2.1 were recorded using the whole-cell perforated patch clamp configuration. CHNs were patched in

862 KRB using pipettes filled with a solution containing (in mM): 135 K-gluconate, 15 KCl, 5 NaCl, 1  
863 MgCl<sub>2</sub>, 0.1 EGTA, 10 HEPES, pH adjusted to 7.22 using KOH, and amphotericin B (Millipore Cat#  
864 171375) dissolved in DMSO and added at a final concentration of approximately 50 µg/mL. Upon  
865 obtaining a GΩ seal, the amplifier was switched to the current clamp mode to record spontaneous  
866 fluctuations in the  $V_m$ . Measurement of the  $V_m$  (sampled at 25 kHz) and widefield image acquisition  
867 (acquired at 0.2 Hz) were triggered simultaneously using the same microscope described above.

868

869 Experimental design and statistical analysis. For all data sets presented in this study for which statistical  
870 analysis were performed, measurements were imported into GraphPad Prism and Microsoft Excel for  
871 presentation and statistical analysis. Exact p-values are reported in each figure or figure legend. Proteomics  
872 on brain samples were collected from a from three independent sets of age-matched male wild-type and  
873 Kv2.1 KO adult mice. For experiments involving HEK293T cells and CHNs, at least two independent  
874 cultures were used for experimentation; the number of samples ( $n$ ) indicates the number of cells analyzed  
875 and is noted in each figure legend.

876

## 877 **Acknowledgements**

878 We thank Kimberly Nguyen and Grace Or Mizuno for assistance in preparation of rat CHNs. Much of the  
879 microscopy in this study was performed using the resources of the UC Davis MCB Imaging Facility. The  
880 proteomics experiments in this study were performed using the resources of the UC Davis Proteomics  
881 Core Facility. This project was funded by National Institutes of Health Grants U01NS0997 (JST),  
882 R21NS101648 (JST), R01HL144071 (LFS and JST), T32GM007377 (MK), and F32NS108519 (NCV).

883

## 884 **Competing Interests**

885 The authors declare no competing interests.

886

887 **References**

- 888 Antonucci, D.E., S.T. Lim, S. Vassanelli, and J.S. Trimmer. 2001. Dynamic localization and clustering of  
889 dendritic Kv2.1 voltage-dependent potassium channels in developing hippocampal neurons.  
890 *Neuroscience*. 108:69-81.
- 891 Aras, M.A., R.A. Saadi, and E. Aizenman. 2009. Zn<sup>2+</sup> regulates Kv2.1 voltage-dependent gating and  
892 localization following ischemia. *Eur J Neurosci*. 30:2250-2257. DOI: 10.1111/j.1460-  
893 9568.2009.07026.x.
- 894 Benson, D.L., F.H. Watkins, O. Steward, and G. Banker. 1994. Characterization of GABAergic neurons  
895 in hippocampal cell cultures. *J Neurocytol*. 23:279-295.
- 896 Berjukow, S., F. Doring, M. Froschmayr, M. Grabner, H. Glossmann, and S. Hering. 1996. Endogenous  
897 calcium channels in human embryonic kidney (HEK293) cells. *Br J Pharmacol*. 118:748-754.  
898 DOI: 10.1111/j.1476-5381.1996.tb15463.x.
- 899 Berrouit, J., and M. Isokawa. 2009. Homeostatic and stimulus-induced coupling of the L-type Ca<sup>2+</sup>  
900 channel to the ryanodine receptor in the hippocampal neuron in slices. *Cell Calcium*. 46:30-38.  
901 DOI: 10.1016/j.ceca.2009.03.018.
- 902 Bers, D.M., and E. Perez-Reyes. 1999. Ca channels in cardiac myocytes: structure and function in Ca  
903 influx and intracellular Ca release. *Cardiovasc Res*. 42:339-360. DOI: 10.1016/s0008-  
904 6363(99)00038-3.
- 905 Bishop, H.I., D. Guan, E. Bocksteins, L.K. Parajuli, K.D. Murray, M.M. Cobb, H. Misonou, K. Zito, R.C.  
906 Foehring, and J.S. Trimmer. 2015. Distinct cell- and layer-specific expression patterns and  
907 independent regulation of Kv2 channel subtypes in cortical pyramidal neurons. *J Neurosci*.  
908 35:14922-14942. DOI: 10.1523/JNEUROSCI.1897-15.2015.
- 909 Blaich, A., A. Welling, S. Fischer, J.W. Wegener, K. Kostner, F. Hofmann, and S. Moosmang. 2010.  
910 Facilitation of murine cardiac L-type Ca(v)1.2 channel is modulated by calmodulin kinase II-  
911 dependent phosphorylation of S1512 and S1570. *Proc Natl Acad Sci U S A*. 107:10285-10289.  
912 DOI: 10.1073/pnas.0914287107.
- 913 Bozarth, X., J.N. Dines, Q. Cong, G.M. Mirzaa, K. Foss, J. Lawrence Merritt, 2nd, J. Thies, H.C.  
914 Mefford, and E. Novotny. 2018. Expanding clinical phenotype in CACNA1C related disorders:  
915 From neonatal onset severe epileptic encephalopathy to late-onset epilepsy. *Am J Med Genet A*.  
916 176:2733-2739. DOI: 10.1002/ajmg.a.40657.
- 917 Burgoyne, T., S. Patel, and E.R. Eden. 2015. Calcium signaling at ER membrane contact sites. *Biochim*  
918 *Biophys Acta*. 1853:2012-2017. DOI: 10.1016/j.bbamcr.2015.01.022.
- 919 Catterall, W.A. 2011. Voltage-gated calcium channels. *Cold Spring Harb Perspect Biol*. 3:a003947. DOI:  
920 10.1101/cshperspect.a003947.
- 921 Chang, C.L., Y.J. Chen, and J. Liou. 2017. ER-plasma membrane junctions: Why and how do we study  
922 them? *Biochim Biophys Acta Mol Cell Res*. 1864:1494-1506. DOI:  
923 10.1016/j.bbamcr.2017.05.018.
- 924 Cheng, H., and W.J. Lederer. 2008. Calcium sparks. *Physiol Rev*. 88:1491-1545. DOI:  
925 10.1152/physrev.00030.2007.
- 926 Cheng, H., W.J. Lederer, and M.B. Cannell. 1993. Calcium sparks: elementary events underlying  
927 excitation-contraction coupling in heart muscle. *Science*. 262:740-744. DOI:  
928 10.1126/science.8235594.
- 929 Chung, W.Y., A. Jha, M. Ahuja, and S. Muallem. 2017. Ca(2+) influx at the ER/PM junctions. *Cell*  
930 *Calcium*. 63:29-32. DOI: 10.1016/j.ceca.2017.02.009.
- 931 Cohen, S.M., B. Li, R.W. Tsien, and H. Ma. 2015. Evolutionary and functional perspectives on signaling  
932 from neuronal surface to nucleus. *Biochem Biophys Res Commun*. 460:88-99. DOI:  
933 10.1016/j.bbrc.2015.02.146.
- 934 Da Silva, W.C., G. Cardoso, J.S. Bonini, F. Benetti, and I. Izquierdo. 2013. Memory reconsolidation and  
935 its maintenance depend on L-voltage-dependent calcium channels and CaMKII functions

- 936 regulating protein turnover in the hippocampus. *Proc Natl Acad Sci U S A*. 110:6566-6570. DOI:  
937 10.1073/pnas.1302356110.
- 938 Dai, S., D.D. Hall, and J.W. Hell. 2009. Supramolecular assemblies and localized regulation of voltage-  
939 gated ion channels. *Physiol Rev*. 89:411-452. DOI: 10.1152/physrev.00029.2007.
- 940 Davare, M.A., V. Avdonin, D.D. Hall, E.M. Peden, A. Burette, R.J. Weinberg, M.C. Horne, T. Hoshi, and  
941 J.W. Hell. 2001. A beta2 adrenergic receptor signaling complex assembled with the Ca<sup>2+</sup> channel  
942 Cav1.2. *Science*. 293:98-101. DOI: 10.1126/science.293.5527.98.
- 943 de Kovel, C.G.F., S. Syrbe, E.H. Brilstra, N. Verbeek, B. Kerr, H. Dubbs, A. Bayat, S. Desai, S. Naidu, S.  
944 Srivastava, H. Cagaylan, U. Yis, C. Saunders, M. Rook, S. Plugge, H. Muhle, Z. Afawi, K.M.  
945 Klein, V. Jayaraman, R. Rajagopalan, E. Goldberg, E. Marsh, S. Kessler, C. Bergqvist, L.K.  
946 Conlin, B.L. Krok, I. Thiffault, M. Pendziwiat, I. Helbig, T. Polster, I. Borggraefe, J.R. Lemke,  
947 M.J. van den Boogaardt, R.S. Moller, and B.P.C. Koeleman. 2017. Neurodevelopmental disorders  
948 caused by de novo variants in KCNB1 genotypes and phenotypes. *JAMA Neurol*. 74:1228-1236.  
949 DOI: 10.1001/jamaneurol.2017.1714.
- 950 Di Biase, V., G.J. Obermair, Z. Szabo, C. Altier, J. Sanguesa, E. Bourinet, and B.E. Flucher. 2008. Stable  
951 membrane expression of postsynaptic CaV1.2 calcium channel clusters is independent of  
952 interactions with AKAP79/150 and PDZ proteins. *J Neurosci*. 28:13845-13855. DOI:  
953 10.1523/JNEUROSCI.3213-08.2008.
- 954 Dickson, E.J. 2017. Endoplasmic reticulum-plasma membrane contacts regulate cellular excitability. *Adv*  
955 *Exp Med Biol*. 997:95-109. DOI: 10.1007/978-981-10-4567-7\_7.
- 956 Dirnagl, U., C. Iadecola, and M.A. Moskowitz. 1999. Pathobiology of ischaemic stroke: an integrated  
957 view. *Trends Neurosci*. 22:391-397.
- 958 Dittmer, P.J., M.L. Dell'Acqua, and W.A. Sather. 2019. Synaptic crosstalk conferred by a zone of  
959 differentially regulated Ca(2+) signaling in the dendritic shaft adjoining a potentiated spine. *Proc*  
960 *Natl Acad Sci U S A*. 116:13611-13620. DOI: 10.1073/pnas.1902461116.
- 961 Dixon, R.E., C.M. Moreno, C. Yuan, X. Opitz-Araya, M.D. Binder, M.F. Navedo, and L.F. Santana.  
962 2015. Graded Ca(2+)-calmodulin-dependent coupling of voltage-gated CaV1.2 channels. *Elife*.  
963 4. DOI: 10.7554/eLife.05608.
- 964 Dixon, R.E., C. Yuan, E.P. Cheng, M.F. Navedo, and L.F. Santana. 2012. Ca<sup>2+</sup> signaling amplification  
965 by oligomerization of L-type Cav1.2 channels. *Proc Natl Acad Sci U S A*. 109:1749-1754. DOI:  
966 10.1073/pnas.1116731109.
- 967 Du, J., L.L. Haak, E. Phillips-Tansey, J.T. Russell, and C.J. McBain. 2000. Frequency-dependent  
968 regulation of rat hippocampal somato-dendritic excitability by the K<sup>+</sup> channel subunit Kv2.1. *J*  
969 *Physiol*. 522 Pt 1:19-31.
- 970 Du, J., J.H. Tao-Cheng, P. Zerfas, and C.J. McBain. 1998. The K<sup>+</sup> channel, Kv2.1, is apposed to  
971 astrocytic processes and is associated with inhibitory postsynaptic membranes in hippocampal  
972 and cortical principal neurons and inhibitory interneurons. *Neuroscience*. 84:37-48.
- 973 Erxleben, C., Y. Liao, S. Gentile, D. Chin, C. Gomez-Alegria, Y. Mori, L. Birnbaumer, and D.L.  
974 Armstrong. 2006. Cyclosporin and Timothy syndrome increase mode 2 gating of CaV1.2 calcium  
975 channels through aberrant phosphorylation of S6 helices. *Proc Natl Acad Sci U S A*. 103:3932-  
976 3937. DOI: 10.1073/pnas.0511322103.
- 977 Fang, K., and H.M. Colecraft. 2011. Mechanism of auxiliary beta-subunit-mediated membrane targeting  
978 of L-type (Ca(V)1.2) channels. *J Physiol*. 589:4437-4455. DOI: 10.1113/jphysiol.2011.214247.
- 979 Ferreira, M.A., M.C. O'Donovan, Y.A. Meng, I.R. Jones, D.M. Ruderfer, L. Jones, J. Fan, G. Kirov, R.H.  
980 Perlis, E.K. Green, J.W. Smoller, D. Grozeva, J. Stone, I. Nikolov, K. Chambert, M.L. Hamshere,  
981 V.L. Nimgaonkar, V. Moskvina, M.E. Thase, S. Caesar, G.S. Sachs, J. Franklin, K. Gordon-  
982 Smith, K.G. Ardlie, S.B. Gabriel, C. Fraser, B. Blumenstiel, M. Defelice, G. Breen, M. Gill, D.W.  
983 Morris, A. Elkin, W.J. Muir, K.A. McGhee, R. Williamson, D.J. MacIntyre, A.W. MacLean, C.D.  
984 St, M. Robinson, M. Van Beck, A.C. Pereira, R. Kandaswamy, A. McQuillin, D.A. Collier, N.J.  
985 Bass, A.H. Young, J. Lawrence, I.N. Ferrier, A. Anjorin, A. Farmer, D. Curtis, E.M. Scolnick, P.  
986 McGuffin, M.J. Daly, A.P. Corvin, P.A. Holmans, D.H. Blackwood, H.M. Gurling, M.J. Owen,

- 987 S.M. Purcell, P. Sklar, N. Craddock, and C. Wellcome Trust Case Control. 2008. Collaborative  
988 genome-wide association analysis supports a role for ANK3 and CACNA1C in bipolar disorder.  
989 *Nat Genet.* 40:1056-1058. DOI: 10.1038/ng.209.
- 990 Fox, P.D., C.J. Haberkorn, E.J. Akin, P.J. Seel, D. Krapf, and M.M. Tamkun. 2015. Induction of stable  
991 ER-plasma-membrane junctions by Kv2.1 potassium channels. *J Cell Sci.* 128:2096-2105. DOI:  
992 10.1242/jcs.166009.
- 993 Fox, P.D., R.J. Loftus, and M.M. Tamkun. 2013. Regulation of Kv2.1 K(+) conductance by cell surface  
994 channel density. *J Neurosci.* 33:1259-1270. DOI: 10.1523/JNEUROSCI.3008-12.2013.
- 995 Frech, G.C., A.M. VanDongen, G. Schuster, A.M. Brown, and R.H. Joho. 1989. A novel potassium  
996 channel with delayed rectifier properties isolated from rat brain by expression cloning. *Nature.*  
997 340:642-645. DOI: 10.1038/340642a0.
- 998 Friel, D.D., and R.W. Tsien. 1992. A caffeine- and ryanodine-sensitive Ca<sup>2+</sup> store in bullfrog  
999 sympathetic neurones modulates effects of Ca<sup>2+</sup> entry on [Ca<sup>2+</sup>]<sub>i</sub>. *J Physiol.* 450:217-246. DOI:  
1000 10.1113/jphysiol.1992.sp019125.
- 1001 Galice, S., Y. Xie, Y. Yang, D. Sato, and D.M. Bers. 2018. Size matters: ryanodine receptor cluster size  
1002 affects arrhythmogenic sarcoplasmic reticulum calcium release. *J Am Heart Assoc.* 7. DOI:  
1003 10.1161/JAHA.118.008724.
- 1004 Gallo, A., C. Vannier, and T. Galli. 2016. Endoplasmic reticulum-plasma membrane  
1005 associations: structures and functions. *Annu Rev Cell Dev Biol.* 32:279-301. DOI:  
1006 10.1146/annurev-cellbio-111315-125024.
- 1007 Geiger, T., A. Wehner, C. Schaab, J. Cox, and M. Mann. 2012. Comparative proteomic analysis of eleven  
1008 common cell lines reveals ubiquitous but varying expression of most proteins. *Mol Cell*  
1009 *Proteomics.* 11:M111 014050. DOI: 10.1074/mcp.M111.014050.
- 1010 Guan, D., T. Tkatch, D.J. Surmeier, W.E. Armstrong, and R.C. Foehring. 2007. Kv2 subunits underlie  
1011 slowly inactivating potassium current in rat neocortical pyramidal neurons. *J Physiol.* 581:941-  
1012 960. DOI: 10.1113/jphysiol.2007.128454.
- 1013 Hall, D.D., S. Dai, P.Y. Tseng, Z. Malik, M. Nguyen, L. Matt, K. Schnizler, A. Shephard, D.P.  
1014 Mohapatra, F. Tsuruta, R.E. Dolmetsch, C.J. Christel, A. Lee, A. Burette, R.J. Weinberg, and  
1015 J.W. Hell. 2013. Competition between alpha-actinin and Ca(2+)-calmodulin controls surface  
1016 retention of the L-type Ca(2+) channel Ca(V)1.2. *Neuron.* 78:483-497. DOI:  
1017 10.1016/j.neuron.2013.02.032.
- 1018 Hell, J.W., R.E. Westenbroek, C. Warner, M.K. Ahljianian, W. Prystay, M.M. Gilbert, T.P. Snutch, and  
1019 W.A. Catterall. 1993. Identification and differential subcellular localization of the neuronal class  
1020 C and class D L-type calcium channel alpha 1 subunits. *J Cell Biol.* 123:949-962.
- 1021 Helle, S.C., G. Kanfer, K. Kolar, A. Lang, A.H. Michel, and B. Kornmann. 2013. Organization and  
1022 function of membrane contact sites. *Biochim Biophys Acta.* 1833:2526-2541. DOI:  
1023 10.1016/j.bbamer.2013.01.028.
- 1024 Helmuth, J.A., G. Paul, and I.F. Sbalzarini. 2010. Beyond co-localization: inferring spatial interactions  
1025 between sub-cellular structures from microscopy images. *BMC Bioinformatics.* 11:372. DOI:  
1026 10.1186/1471-2105-11-372.
- 1027 Henne, W.M., J. Liou, and S.D. Emr. 2015. Molecular mechanisms of inter-organelle ER-PM contact  
1028 sites. *Curr Opin Cell Biol.* 35:123-130. DOI: 10.1016/j.ceb.2015.05.001.
- 1029 Hofmann, F., V. Flockerzi, S. Kahl, and J.W. Wegener. 2014. L-type CaV1.2 calcium channels: from in  
1030 vitro findings to in vivo function. *Physiol Rev.* 94:303-326. DOI: 10.1152/physrev.00016.2013.
- 1031 Irie, T., and L.O. Trussell. 2017. Double-nanodomain coupling of calcium channels, ryanodine receptors,  
1032 and BK channels controls the generation of burst firing. *Neuron.* 96:856-870 e854. DOI:  
1033 10.1016/j.neuron.2017.10.014.
- 1034 Isokawa, M., and B.E. Alger. 2006. Ryanodine receptor regulates endogenous cannabinoid mobilization  
1035 in the hippocampus. *J Neurophysiol.* 95:3001-3011. DOI: 10.1152/jn.00975.2005.



- 1036 Jacobson, D.A., C.R. Weber, S. Bao, J. Turk, and L.H. Philipson. 2007. Modulation of the pancreatic islet  
1037 beta-cell-delayed rectifier potassium channel Kv2.1 by the polyunsaturated fatty acid  
1038 arachidonate. *J Biol Chem.* 282:7442-7449. DOI: 10.1074/jbc.M607858200.
- 1039 Jiang, M., M. Zhang, M. Howren, Y. Wang, A. Tan, R.C. Balijepalli, J.F. Huizar, and G.N. Tseng. 2016.  
1040 JPH-2 interacts with Cai-handling proteins and ion channels in dyads: Contribution to premature  
1041 ventricular contraction-induced cardiomyopathy. *Heart Rhythm.* 13:743-752. DOI:  
1042 10.1016/j.hrthm.2015.10.037.
- 1043 Johnson, B., A.N. Leek, L. Sole, E.E. Maverick, T.P. Levine, and M.M. Tamkun. 2018. Kv2 potassium  
1044 channels form endoplasmic reticulum/plasma membrane junctions via interaction with VAPA and  
1045 VAPB. *Proc Natl Acad Sci U S A.* 115:E7331-E7340. DOI: 10.1073/pnas.1805757115.
- 1046 Kimm, T., Z.M. Khaliq, and B.P. Bean. 2015. Differential regulation of action potential shape and burst-  
1047 frequency firing by BK and Kv2 channels in substantia nigra dopaminergic neurons. *J Neurosci.*  
1048 35:16404-16417. DOI: 10.1523/JNEUROSCI.5291-14.2015.
- 1049 Kirizis, T., K. Kerti-Szigeti, A. Lorincz, and Z. Nusser. 2014. Distinct axo-somato-dendritic distributions  
1050 of three potassium channels in CA1 hippocampal pyramidal cells. *Eur J Neurosci.* 39:1771-1783.  
1051 DOI: 10.1111/ejn.12526.
- 1052 Kirmiz, M., S. Palacio, P. Thapa, A.N. King, J.T. Sack, and J.S. Trimmer. 2018a. Remodeling neuronal  
1053 ER-PM junctions is a conserved nonconducting function of Kv2 plasma membrane ion channels.  
1054 *Mol Biol Cell.* 29:2410-2432. DOI: 10.1091/mbc.E18-05-0337.
- 1055 Kirmiz, M., N.C. Vierra, S. Palacio, and J.S. Trimmer. 2018b. Identification of VAPA and VAPB as Kv2  
1056 channel-interacting proteins defining endoplasmic reticulum-plasma membrane junctions in  
1057 mammalian brain neurons. *J Neurosci.* 38:7562-7584. DOI: 10.1523/JNEUROSCI.0893-18.2018.
- 1058 Koizumi, S., M.D. Bootman, L.K. Bobanovic, M.J. Schell, M.J. Berridge, and P. Lipp. 1999.  
1059 Characterization of elementary Ca<sup>2+</sup> release signals in NGF-differentiated PC12 cells and  
1060 hippocampal neurons. *Neuron.* 22:125-137.
- 1061 Kramer, A.A., N.E. Ingraham, E.J. Sharpe, and M. Mynlieff. 2012. Levels of Ca(V)1.2 L-type Ca(2+)  
1062 channels peak in the first two weeks in rat hippocampus whereas Ca(v)1.3 channels steadily  
1063 increase through development. *J Signal Transduct.* 2012:597214. DOI: 10.1155/2012/597214.
- 1064 Lacinova, L., S. Moosmang, N. Langwieser, F. Hofmann, and T. Kleppisch. 2008. Cav1.2 calcium  
1065 channels modulate the spiking pattern of hippocampal pyramidal cells. *Life Sci.* 82:41-49. DOI:  
1066 10.1016/j.lfs.2007.10.009.
- 1067 Lam, A.K., and A. Galione. 2013. The endoplasmic reticulum and junctional membrane communication  
1068 during calcium signaling. *Biochim Biophys Acta.* 1833:2542-2559. DOI:  
1069 10.1016/j.bbamcr.2013.06.004.
- 1070 Lim, S.T., D.E. Antonucci, R.H. Scannevin, and J.S. Trimmer. 2000. A novel targeting signal for  
1071 proximal clustering of the Kv2.1 K<sup>+</sup> channel in hippocampal neurons. *Neuron.* 25:385-397.
- 1072 Lipscombe, D., S.E. Allen, and C.P. Toro. 2013. Control of neuronal voltage-gated calcium ion channels  
1073 from RNA to protein. *Trends Neurosci.* 36:598-609. DOI: 10.1016/j.tins.2013.06.008.
- 1074 Liu, P.W., and B.P. Bean. 2014. Kv2 channel regulation of action potential repolarization and firing  
1075 patterns in superior cervical ganglion neurons and hippocampal CA1 pyramidal neurons. *J*  
1076 *Neurosci.* 34:4991-5002. DOI: 10.1523/JNEUROSCI.1925-13.2014.
- 1077 Ma, H., S. Cohen, B. Li, and R.W. Tsien. 2012. Exploring the dominant role of Cav1 channels in  
1078 signalling to the nucleus. *Biosci Rep.* 33:97-101. DOI: 10.1042/BSR20120099.
- 1079 Ma, H., R.D. Groth, S.M. Cohen, J.F. Emery, B. Li, E. Hoedt, G. Zhang, T.A. Neubert, and R.W. Tsien.  
1080 2014. gammaCaMKII shuttles Ca(2+)(+)/CaM to the nucleus to trigger CREB phosphorylation and  
1081 gene expression. *Cell.* 159:281-294. DOI: 10.1016/j.cell.2014.09.019.
- 1082 Mandikian, D., E. Bocksteins, L.K. Parajuli, H.I. Bishop, O. Cerda, R. Shigemoto, and J.S. Trimmer.  
1083 2014. Cell type-specific spatial and functional coupling between mammalian brain Kv2.1 K<sup>+</sup>  
1084 channels and ryanodine receptors. *J Comp Neurol.* 522:3555-3574. DOI: 10.1002/cne.23641.

- 1085 Manita, S., and W.N. Ross. 2009. Synaptic activation and membrane potential changes modulate the  
1086 frequency of spontaneous elementary Ca<sup>2+</sup> release events in the dendrites of pyramidal neurons.  
1087 *J Neurosci.* 29:7833-7845. DOI: 10.1523/JNEUROSCI.0573-09.2009.
- 1088 Marshall, M.R., J.P. Clark, 3rd, R. Westenbroek, F.H. Yu, T. Scheuer, and W.A. Catterall. 2011.  
1089 Functional roles of a C-terminal signaling complex of CaV1 channels and A-kinase anchoring  
1090 protein 15 in brain neurons. *J Biol Chem.* 286:12627-12639. DOI: 10.1074/jbc.M110.175257.
- 1091 Matamales, M. 2012. Neuronal activity-regulated gene transcription: how are distant synaptic signals  
1092 conveyed to the nucleus? *F1000Res.* 1:69. DOI: 10.12688/f1000research.1-69.v1.
- 1093 McCord, M.C., and E. Aizenman. 2013. Convergent Ca<sup>2+</sup> and Zn<sup>2+</sup> signaling regulates apoptotic Kv2.1  
1094 K<sup>+</sup> currents. *Proc Natl Acad Sci U S A.* 110:13988-13993. DOI: 10.1073/pnas.1306238110.
- 1095 Milescu, L.S., B.P. Bean, and J.C. Smith. 2010. Isolation of somatic Na<sup>+</sup> currents by selective  
1096 inactivation of axonal channels with a voltage prepulse. *J Neurosci.* 30:7740-7748. DOI:  
1097 10.1523/JNEUROSCI.6136-09.2010.
- 1098 Misonou, H., M. Menegola, D.P. Mohapatra, L.K. Guy, K.S. Park, and J.S. Trimmer. 2006. Bidirectional  
1099 activity-dependent regulation of neuronal ion channel phosphorylation. *J Neurosci.* 26:13505-  
1100 13514. DOI: 10.1523/JNEUROSCI.3970-06.2006.
- 1101 Misonou, H., D.P. Mohapatra, M. Menegola, and J.S. Trimmer. 2005a. Calcium- and metabolic state-  
1102 dependent modulation of the voltage-dependent Kv2.1 channel regulates neuronal excitability in  
1103 response to ischemia. *J Neurosci.* 25:11184-11193. DOI: 10.1523/JNEUROSCI.3370-05.2005.
- 1104 Misonou, H., D.P. Mohapatra, E.W. Park, V. Leung, D. Zhen, K. Misonou, A.E. Anderson, and J.S.  
1105 Trimmer. 2004. Regulation of ion channel localization and phosphorylation by neuronal activity.  
1106 *Nat Neurosci.* 7:711-718. DOI: 10.1038/nn1260.
- 1107 Misonou, H., D.P. Mohapatra, and J.S. Trimmer. 2005b. Kv2.1: a voltage-gated k<sup>+</sup> channel critical to  
1108 dynamic control of neuronal excitability. *Neurotoxicology.* 26:743-752. DOI:  
1109 10.1016/j.neuro.2005.02.003.
- 1110 Miyazaki, K., S. Manita, and W.N. Ross. 2012. Developmental profile of localized spontaneous Ca(2+)  
1111 release events in the dendrites of rat hippocampal pyramidal neurons. *Cell Calcium.* 52:422-432.  
1112 DOI: 10.1016/j.ceca.2012.08.001.
- 1113 Miyazaki, K., and W.N. Ross. 2013. Ca<sup>2+</sup> sparks and puffs are generated and interact in rat hippocampal  
1114 CA1 pyramidal neuron dendrites. *J Neurosci.* 33:17777-17788. DOI:  
1115 10.1523/JNEUROSCI.2735-13.2013.
- 1116 Moosmang, S., N. Haider, N. Klugbauer, H. Adelsberger, N. Langwieser, J. Muller, M. Stiess, E. Marais,  
1117 V. Schulla, L. Lacinova, S. Goebbels, K.A. Nave, D.R. Storm, F. Hofmann, and T. Kleppisch.  
1118 2005. Role of hippocampal Cav1.2 Ca<sup>2+</sup> channels in NMDA receptor-independent synaptic  
1119 plasticity and spatial memory. *J Neurosci.* 25:9883-9892. DOI: 10.1523/JNEUROSCI.1531-  
1120 05.2005.
- 1121 Moreno, C.M., R.E. Dixon, S. Tajada, C. Yuan, X. Opitz-Araya, M.D. Binder, and L.F. Santana. 2016.  
1122 Ca(2+) entry into neurons is facilitated by cooperative gating of clustered CaV1.3 channels. *Elife.*  
1123 5. DOI: 10.7554/eLife.15744.
- 1124 Mulholland, P.J., E.P. Carpenter-Hyland, M.C. Hearing, H.C. Becker, J.J. Woodward, and L.J. Chandler.  
1125 2008. Glutamate transporters regulate extrasynaptic NMDA receptor modulation of Kv2.1  
1126 potassium channels. *J Neurosci.* 28:8801-8809. DOI: 10.1523/JNEUROSCI.2405-08.2008.
- 1127 Murakoshi, H., and J.S. Trimmer. 1999. Identification of the Kv2.1 K<sup>+</sup> channel as a major component of  
1128 the delayed rectifier K<sup>+</sup> current in rat hippocampal neurons. *J Neurosci.* 19:1728-1735.
- 1129 Nakahira, K., G. Shi, K.J. Rhodes, and J.S. Trimmer. 1996. Selective interaction of voltage-gated K<sup>+</sup>  
1130 channel beta-subunits with alpha-subunits. *J Biol Chem.* 271:7084-7089. DOI:  
1131 10.1074/jbc.271.12.7084.
- 1132 Navedo, M.F., G.C. Amberg, V.S. Votaw, and L.F. Santana. 2005. Constitutively active L-type Ca<sup>2+</sup>  
1133 channels. *Proc Natl Acad Sci U S A.* 102:11112-11117. DOI: 10.1073/pnas.0500360102.

- 1134 Navedo, M.F., E.P. Cheng, C. Yuan, S. Votaw, J.D. Molkentin, J.D. Scott, and L.F. Santana. 2010.  
1135 Increased coupled gating of L-type Ca<sup>2+</sup> channels during hypertension and Timothy syndrome.  
1136 *Circ Res.* 106:748-756. DOI: 10.1161/CIRCRESAHA.109.213363.
- 1137 Neely, A., and P. Hidalgo. 2014. Structure-function of proteins interacting with the alpha1 pore-forming  
1138 subunit of high-voltage-activated calcium channels. *Front Physiol.* 5:209. DOI:  
1139 10.3389/fphys.2014.00209.
- 1140 Obermair, G.J., W.A. Kaufmann, H.G. Knaus, and B.E. Flucher. 2003. The small conductance Ca<sup>2+</sup>-  
1141 activated K<sup>+</sup> channel SK3 is localized in nerve terminals of excitatory synapses of cultured  
1142 mouse hippocampal neurons. *Eur J Neurosci.* 17:721-731.
- 1143 Obermair, G.J., Z. Szabo, E. Bourinet, and B.E. Flucher. 2004. Differential targeting of the L-type Ca<sup>2+</sup>  
1144 channel alpha 1C (CaV1.2) to synaptic and extrasynaptic compartments in hippocampal neurons.  
1145 *Eur J Neurosci.* 19:2109-2122. DOI: 10.1111/j.0953-816X.2004.03272.x.
- 1146 Ouyang, K., H. Zheng, X. Qin, C. Zhang, D. Yang, X. Wang, C. Wu, Z. Zhou, and H. Cheng. 2005. Ca<sup>2+</sup>  
1147 sparks and secretion in dorsal root ganglion neurons. *Proc Natl Acad Sci U S A.* 102:12259-  
1148 12264. DOI: 10.1073/pnas.0408494102.
- 1149 Palacio, S., V. Chevaleyre, D.H. Brann, K.D. Murray, R.A. Piskorowski, and J.S. Trimmer. 2017.  
1150 Heterogeneity in Kv2 channel expression shapes action potential characteristics and firing  
1151 patterns in CA1 versus CA2 hippocampal pyramidal neurons. *eNeuro.* 4. DOI:  
1152 10.1523/ENEURO.0267-17.2017.
- 1153 Perni, S., M. Lavorato, and K.G. Beam. 2017. De novo reconstitution reveals the proteins required for  
1154 skeletal muscle voltage-induced Ca(2+) release. *Proc Natl Acad Sci U S A.* 114:13822-13827.  
1155 DOI: 10.1073/pnas.1716461115.
- 1156 Pritchard, H.A.T., P.W. Pires, E. Yamasaki, P. Thakore, and S. Earley. 2018. Nanoscale remodeling of  
1157 ryanodine receptor cluster size underlies cerebral microvascular dysfunction in Duchenne  
1158 muscular dystrophy. *Proc Natl Acad Sci U S A.* 115:E9745-E9752. DOI:  
1159 10.1073/pnas.1804593115.
- 1160 Rhodes, K.J., K.I. Carroll, M.A. Sung, L.C. Doliveira, M.M. Monaghan, S.L. Burke, B.W. Strassle, L.  
1161 Buchwalder, M. Menegola, J. Cao, W.F. An, and J.S. Trimmer. 2004. KChIPs and Kv4 alpha  
1162 subunits as integral components of A-type potassium channels in mammalian brain. *J Neurosci.*  
1163 24:7903-7915. DOI: 10.1523/JNEUROSCI.0776-04.2004.
- 1164 Rosenbluth, J. 1962. Subsurface cisterns and their relationship to the neuronal plasma membrane. *J Cell*  
1165 *Biol.* 13:405-421.
- 1166 Ross, W.N. 2012. Understanding calcium waves and sparks in central neurons. *Nat Rev Neurosci.* 13:157-  
1167 168. DOI: 10.1038/nrn3168.
- 1168 Rougier, J.S., and H. Abriel. 2016. Cardiac voltage-gated calcium channel macromolecular complexes.  
1169 *Biochim Biophys Acta.* 1863:1806-1812. DOI: 10.1016/j.bbamer.2015.12.014.
- 1170 Scannevin, R.H., H. Murakoshi, K.J. Rhodes, and J.S. Trimmer. 1996. Identification of a cytoplasmic  
1171 domain important in the polarized expression and clustering of the Kv2.1 K<sup>+</sup> channel. *J Cell Biol.*  
1172 135:1619-1632.
- 1173 Schnell, S.A., W.A. Staines, and M.W. Wessendorf. 1999. Reduction of lipofuscin-like autofluorescence  
1174 in fluorescently labeled tissue. *J Histochem Cytochem.* 47:719-730. DOI:  
1175 10.1177/002215549904700601.
- 1176 Shi, G., A.K. Kleinklaus, N.V. Marrion, and J.S. Trimmer. 1994. Properties of Kv2.1 K<sup>+</sup> channels  
1177 expressed in transfected mammalian cells. *J Biol Chem.* 269:23204-23211.
- 1178 Shigetomi, E., S. Kracun, and B.S. Khakh. 2010. Monitoring astrocyte calcium microdomains with  
1179 improved membrane targeted GCaMP reporters. *Neuron Glia Biol.* 6:183-191. DOI:  
1180 10.1017/S1740925X10000219.
- 1181 Shivanandan, A., A. Radenovic, and I.F. Sbalzarini. 2013. MosaicIA: an ImageJ/Fiji plugin for spatial  
1182 pattern and interaction analysis. *BMC Bioinformatics.* 14:349. DOI: 10.1186/1471-2105-14-349.
- 1183 Shuja, Z., and H.M. Colecraft. 2018. Regulation of microdomain voltage-gated L-type calcium channels  
1184 in cardiac health and disease. *Curr Opin Physiol.* 2:13-18. DOI: 10.1016/j.cophys.2017.12.005.

- 1185 Simms, B.A., and G.W. Zamponi. 2014. Neuronal voltage-gated calcium channels: structure, function,  
1186 and dysfunction. *Neuron*. 82:24-45. DOI: 10.1016/j.neuron.2014.03.016.
- 1187 Sinnegger-Brauns, M.J., I.G. Huber, A. Koschak, C. Wild, G.J. Obermair, U. Einzinger, J.C. Hoda, S.B.  
1188 Sartori, and J. Striessnig. 2009. Expression and 1,4-dihydropyridine-binding properties of brain  
1189 L-type calcium channel isoforms. *Mol Pharmacol*. 75:407-414. DOI: 10.1124/mol.108.049981.
- 1190 Speca, D.J., G. Ogata, D. Mandikian, H.I. Bishop, S.W. Wiler, K. Eum, H.J. Wenzel, E.T. Doisy, L. Matt,  
1191 K.L. Campi, M.S. Golub, J.M. Nerbonne, J.W. Hell, B.C. Trainor, J.T. Sack, P.A. Schwartzkroin,  
1192 and J.S. Trimmer. 2014. Deletion of the Kv2.1 delayed rectifier potassium channel leads to  
1193 neuronal and behavioral hyperexcitability. *Genes Brain Behav*. 13:394-408. DOI:  
1194 10.1111/gbb.12120.
- 1195 Splawski, I., K.W. Timothy, L.M. Sharpe, N. Decher, P. Kumar, R. Bloise, C. Napolitano, P.J. Schwartz,  
1196 R.M. Joseph, K. Condouris, H. Tager-Flusberg, S.G. Priori, M.C. Sanguinetti, and M.T. Keating.  
1197 2004. Ca(V)1.2 calcium channel dysfunction causes a multisystem disorder including arrhythmia  
1198 and autism. *Cell*. 119:19-31. DOI: 10.1016/j.cell.2004.09.011.
- 1199 Spruston, N., and C. McBain. 2007. Structural and functional properties of hippocampal neurons. *In* The  
1200 Hippocampus Book P. Andersen, R. Morris, D. Amaral, T. Bliss, and J. O'Keefe, editors. Oxford  
1201 University Press,, New York. 133-201.
- 1202 Stanika, R.I., B.E. Flucher, and G.J. Obermair. 2015. Regulation of postsynaptic stability by the L-type  
1203 calcium channel Cav1.3 and its interaction with PDZ proteins. *Curr Mol Pharmacol*. 8:95-101.
- 1204 Tao-Cheng, J.H. 2018. Activity-dependent decrease in contact areas between subsurface cisterns and  
1205 plasma membrane of hippocampal neurons. *Mol Brain*. 11:23. DOI: 10.1186/s13041-018-0366-7.
- 1206 Tian, L., S.A. Hires, T. Mao, D. Huber, M.E. Chiappe, S.H. Chalasani, L. Petreanu, J. Akerboom, S.A.  
1207 McKinney, E.R. Schreiter, C.I. Bargmann, V. Jayaraman, K. Svoboda, and L.L. Looger. 2009.  
1208 Imaging neural activity in worms, flies and mice with improved GCaMP calcium indicators. *Nat*  
1209 *Methods*. 6:875-881. DOI: 10.1038/nmeth.1398.
- 1210 Tippens, A.L., J.F. Pare, N. Langwieser, S. Moosmang, T.A. Milner, Y. Smith, and A. Lee. 2008.  
1211 Ultrastructural evidence for pre- and postsynaptic localization of Cav1.2 L-type Ca<sup>2+</sup> channels in  
1212 the rat hippocampus. *J Comp Neurol*. 506:569-583. DOI: 10.1002/cne.21567.
- 1213 Trimmer, J.S. 1991. Immunological identification and characterization of a delayed rectifier K<sup>+</sup> channel  
1214 polypeptide in rat brain. *Proc Natl Acad Sci U S A*. 88:10764-10768.
- 1215 Trimmer, J.S. 2015. Subcellular localization of K<sup>+</sup> channels in mammalian brain neurons: remarkable  
1216 precision in the midst of extraordinary complexity. *Neuron*. 85:238-256. DOI:  
1217 10.1016/j.neuron.2014.12.042.
- 1218 Tseng, P.Y., P.B. Henderson, A.C. Hergarden, T. Patriarchi, A.M. Coleman, M.W. Lillya, C. Montagut-  
1219 Bordas, B. Lee, J.W. Hell, and M.C. Horne. 2017. alpha-Actinin promotes surface localization  
1220 and current density of the Ca(2+) channel Cav1.2 by binding to the IQ region of the alpha1  
1221 subunit. *Biochemistry*. 56:3669-3681. DOI: 10.1021/acs.biochem.7b00359.
- 1222 Tsien, R.W., B.P. Bean, P. Hess, J.B. Lansman, B. Nilius, and M.C. Nowycky. 1986. Mechanisms of  
1223 calcium channel modulation by beta-adrenergic agents and dihydropyridine calcium agonists. *J*  
1224 *Mol Cell Cardiol*. 18:691-710.
- 1225 Wang, S., R.I. Stanika, X. Wang, J. Hagen, M.B. Kennedy, G.J. Obermair, R.J. Colbran, and A. Lee.  
1226 2017. Densin-180 controls the trafficking and signaling of L-type voltage-gated Cav1.2 Ca(2+)  
1227 channels at excitatory synapses. *J Neurosci*. 37:4679-4691. DOI: 10.1523/JNEUROSCI.2583-  
1228 16.2017.
- 1229 Westenbroek, R.E., M.K. Ahljianian, and W.A. Catterall. 1990. Clustering of L-type Ca<sup>2+</sup> channels at the  
1230 base of major dendrites in hippocampal pyramidal neurons. *Nature*. 347:281-284. DOI:  
1231 10.1038/347281a0.
- 1232 Wheeler, D.G., C.F. Barrett, R.D. Groth, P. Safa, and R.W. Tsien. 2008. CaMKII locally encodes L-type  
1233 channel activity to signal to nuclear CREB in excitation-transcription coupling. *J Cell Biol*.  
1234 183:849-863. DOI: 10.1083/jcb.200805048.

- 1235 Wheeler, D.G., R.D. Groth, H. Ma, C.F. Barrett, S.F. Owen, P. Safa, and R.W. Tsien. 2012. Ca(V)1 and  
1236 Ca(V)2 channels engage distinct modes of Ca(2+) signaling to control CREB-dependent gene  
1237 expression. *Cell*. 149:1112-1124. DOI: 10.1016/j.cell.2012.03.041.
- 1238 Wiera, G., D. Nowak, I. van Hove, P. Dziegiel, L. Moons, and J.W. Mozrzymas. 2017. Mechanisms of  
1239 NMDA receptor- and voltage-gated L-type calcium channel-dependent hippocampal LTP  
1240 critically rely on proteolysis that is mediated by distinct metalloproteinases. *J Neurosci*. 37:1240-  
1241 1256. DOI: 10.1523/JNEUROSCI.2170-16.2016.
- 1242 Wild, A.R., B.L. Sinnen, P.J. Dittmer, M.J. Kennedy, W.A. Sather, and M.L. Dell'Acqua. 2019. Synapse-  
1243 to-nucleus communication through NFAT Is mediated by L-type Ca(2+) channel Ca(2+) spike  
1244 propagation to the soma. *Cell Rep*. 26:3537-3550 e3534. DOI: 10.1016/j.celrep.2019.03.005.
- 1245 Wu, Y., C. Whiteus, C.S. Xu, K.J. Hayworth, R.J. Weinberg, H.F. Hess, and P. De Camilli. 2017.  
1246 Contacts between the endoplasmic reticulum and other membranes in neurons. *Proc Natl Acad  
1247 Sci U S A*. 114:E4859-E4867. DOI: 10.1073/pnas.1701078114.
- 1248 Yap, E.L., and M.E. Greenberg. 2018. Activity-regulated transcription: bridging the gap between neural  
1249 activity and behavior. *Neuron*. 100:330-348. DOI: 10.1016/j.neuron.2018.10.013.
- 1250 Zalk, R., S.E. Lehnart, and A.R. Marks. 2007. Modulation of the ryanodine receptor and intracellular  
1251 calcium. *Annu Rev Biochem*. 76:367-385. DOI: 10.1146/annurev.biochem.76.053105.094237.
- 1252 Zamponi, G.W., J. Striessnig, A. Koschak, and A.C. Dolphin. 2015. The physiology, pathology, and  
1253 pharmacology of voltage-gated calcium channels and their future therapeutic potential.  
1254 *Pharmacol Rev*. 67:821-870. DOI: 10.1124/pr.114.009654.
- 1255 Zhang, H., A. Maximov, Y. Fu, F. Xu, T.S. Tang, T. Tkatch, D.J. Surmeier, and I. Bezprozvanny. 2005.  
1256 Association of CaV1.3 L-type calcium channels with Shank. *J Neurosci*. 25:1037-1049. DOI:  
1257 10.1523/JNEUROSCI.4554-04.2005.

1258

1259

## 1260 **Figure Legends**

1261 **Figure 1. Kv2.1 spatially associates with Cav1.2 and RyRs in brain neurons.** (A) Single optical  
1262 section image of a rat CHN immunolabeled for PSD-95, Cav1.2, and MAP2 (scale bar: 20  $\mu$ m). Note  
1263 large population of somatic Cav1.2 channels distant from excitatory synapses located primarily on more  
1264 distal dendrites. Inset of merged panel shows expanded view of dendritic PSD-95 and Cav1.2  
1265 immunolabeling marked by box (inset scale bar: 5  $\mu$ m). (B) Single confocal optical section of the soma of  
1266 rat CHN immunolabeled for Kv2.1, Cav1.2, and RyRs (scale bar: 5  $\mu$ m). The row of panels below the  
1267 main panels shows an expanded view of somatic immunolabeling in the region marked by the box in the  
1268 main panels; arrows indicate selected regions of colocalized Kv2.1, Cav1.2, and RyR immunolabeling  
1269 (inset scale bar: 1  $\mu$ m). (C) As in B, but in a CHN displaying more prominent colocalization of clustered  
1270 Kv2.1, Cav1.2, and RyRs. (D) Super resolution (N-SIM) image of the basal membrane of the soma of a  
1271 rat CHN immunolabeled for Kv2.1, Cav1.2, and Cav1.3 (scale bar: 5  $\mu$ m). (E) Expanded view of the

1272 boxed region in the merged image of D (scale bar: 1.25  $\mu\text{m}$ ). (F) Super resolution (N-SIM) image of the  
1273 basal membrane of the soma of a rat CHN immunolabeled for Cav1.3 and RyRs (scale bar: 5  $\mu\text{m}$ ). Inset  
1274 in merged panel shows a higher magnification view of the boxed area (inset scale bar: 0.625  $\mu\text{m}$ ). (G)  
1275 Panels show exemplar images of the hippocampus acquired from a brain section from an adult rat  
1276 immunolabeled for Kv2.1 (red), Cav1.2, (green) and RyRs (blue), and the merged image (scale bar: 200  
1277  $\mu\text{m}$ ). (H) As in G, but acquired from an adult mouse brain section. (I) Confocal optical section obtained  
1278 from the dentate gyrus of a rat brain section immunolabeled for Kv2.1 (red) and Cav1.2 (green) (scale  
1279 bar: 10  $\mu\text{m}$ ). The row below the main panels shows expanded views of immunolabeling in the region  
1280 marked by the box in the main panels; arrowheads indicate region selected for intensity profile line scan  
1281 (scale bar: 2  $\mu\text{m}$ ). Line scan obtained from inset is shown to the right. (J) Confocal optical section  
1282 obtained from the pyramidal cell layer of hippocampal area CA1 in a rat brain section immunolabeled for  
1283 Kv2.1 (red), Cav1.2 (green), and RyRs (blue) (scale bar: 10  $\mu\text{m}$ ). The row below the main panels shows  
1284 expanded view of immunolabeling in the region marked by the box in the main panels (scale bar: 2  $\mu\text{m}$ ).  
1285 (K) As in I but acquired from a mouse brain section. (L) As in J but acquired from a mouse brain section.  
1286

1287 **Figure 2. LTCCs are recruited to Kv2-induced EPJs.** (A) Upper row: TIRF images of a HEK293T cell  
1288 cotransfected with GFP-Cav1.2 (green), BFP-SEC61 $\beta$  (blue) and LTCC auxiliary subunits Cav $\beta$ 3 and  
1289 Cav $\alpha$ 2 $\delta$ 1 (not shown) and without Kv2.1 (scale bar: 10  $\mu\text{m}$ ). Lower row: as in upper row, but in a cell  
1290 additionally cotransfected with DsRed-Kv2.1. (B) Summary graphs of Cav1.2 cluster size (left panel), the  
1291 cluster size frequency distribution (center panel), and a scatterplot of paired measurements of Kv2.1 and  
1292 Cav1.2 cluster sizes (left panel) measured from HEK293T cells transfected with GFP-Cav1.2, Cav $\beta$ 3, and  
1293 Cav $\alpha$ 2 $\delta$ 1 alone (black) or additionally cotransfected with DsRed-Kv2.1 (red) Bars are mean  $\pm$ SD (\*\*\*\*p  
1294  $<10^{-15}$ , two-tailed *t*-test, *n*=3 cells). (C) TIRF images of a HEK293T cell cotransfected with DsRed-Kv2.2  
1295 (red), GFP-Cav1.2 (green), BFP-SEC61 $\beta$  (blue) and Cav $\beta$ 3 and Cav $\alpha$ 2 $\delta$ 1 (not shown). (D) TIRF images  
1296 GFP-Cav1.2 in HEK293T cells cotransfected with GFP-Cav1.2, Cav $\beta$ 3 and Cav $\alpha$ 2 $\delta$ 1, either alone or with  
1297 the non-clustered Kv2.1<sub>S586A</sub> point mutant, Kv2.1<sub>WT</sub>, or the non-conducting Kv2.1<sub>P404W</sub> point mutant

1298 (scale bar: 10  $\mu\text{m}$  and holds for all panels). (E) Summary graph of coefficient of variation (CV) values of  
1299 GFP-Cav1.2 fluorescent signal intensity measured from HEK293T cells cotransfected with GFP-Cav1.2  
1300 and the indicated Kv2.1 isoforms. Each point corresponds to a single cell. Bars are mean  $\pm$ SD (Cav1.2  
1301 alone vs. Kv2.1<sub>S586A</sub>,  $p=0.6914$ ; Cav1.2 alone vs. Kv2.1<sub>WT</sub>, \*\*\*\* $p=3.904 \times 10^{-12}$ ; Cav1.2 alone vs.  
1302 Kv2.1<sub>P404W</sub>, \*\*\*\* $p=7.812 \times 10^{-9}$ ; two-tailed *t*-test). (F) Optical sections of HEK293T cells transfected with  
1303 and immunolabeled for surface Cav1.2-HA and Kv1.5 (upper panels) or Kv2.1 (lower panels) (scale bar:  
1304 10  $\mu\text{m}$  and holds for all panels). (G) Summary graph of CV values of Cav1.2-HA fluorescent signal  
1305 intensity measured from HEK293T cells cotransfected with Kv1.5 or Kv2.1. Each point corresponds to a  
1306 single cell (\* $p=0.0348$  versus Kv1.5, two-tailed *t*-test). (H) Optical sections of HEK293T cells transfected  
1307 with and immunolabeled for Cav3.1 alone (upper panel) or with Kv2.1 (lower panels) (scale bar: 10  $\mu\text{m}$   
1308 and holds for all panels). (I) Summary graph of CV values of Cav3.1 fluorescent signal intensity  
1309 measured from HEK293T cells described in H. Each point corresponds to a single cell ( $p=0.4027$ , two-  
1310 tailed *t*-test). (J) TIRF images of a HEK293T cell cotransfected with DsRed-Kv2.1 (red), Cav1.2 (green),  
1311 YFP-RyR2 (blue), and auxiliary subunits Cav $\beta$ 3, Cav $\alpha_2\delta_1$ , and STAC1 (not shown) (scale bar: 10  $\mu\text{m}$ ).  
1312 (K) Line scan of fluorescence signal intensities of ROI depicted in J.

1313

1314 **Figure 3. Spontaneous Ca<sup>2+</sup> signals are generated at Kv2.1-associated EPJs.** (A) Widefield image of a  
1315 rat CHN transfected with GCaMP3-Kv2.1 (also see movie S1). Arrows indicate selected Kv2.1 clusters  
1316 whose fluorescent intensity profiles are plotted in panel B (scale bar: 10  $\mu\text{m}$ ). (B) Fluorescence intensity  
1317 traces (upper panels) and kymographs (lower panels) corresponding to the four ROIs indicated in panel A.  
1318 Note spontaneous sparks occurring at ROI 2 that are not detected by the adjacent ROI 4. (C) Amplitude  
1319 ( $\Delta F/F_0$ ) and spatial spread (full width at half maximum, FWHM;  $\mu\text{m}$ ) of all spatially distinct localized  
1320 Ca<sup>2+</sup> signals recorded from the neuron in panel A over a period of 90 seconds. (D) Summary data of the  
1321 amplitude, frequency and spatial spread (width) of all spatially distinct localized Ca<sup>2+</sup> signals recorded  
1322 from CHNs expressing GCaMP3-Kv2.1 or GCaMP3-Kv2.1<sub>P404W</sub>. Each point corresponds to a single cell.  
1323 No significant differences were detected. Bars are mean  $\pm$ SD (Student's *t* test). (E) Image of a rat CHN

1324 transfected with GCaMP3-Kv2.1 from which simultaneous GCaMP3-Kv2.1 fluorescence and membrane  
1325 potential values were acquired (scale bar: 10  $\mu\text{m}$ ). Numbered arrows correspond to ROIs whose  
1326 fluorescence intensity traces are depicted below image. Membrane potential measurements are provided  
1327 in the bottom trace. The inset shows an expanded view of ROI  $\text{Ca}^{2+}$  traces and membrane potential  
1328 values from region of the time course indicated by the dashed box in the membrane potential trace. (F)  
1329 Representative rat CHN loaded with Cal590 and imaged with TIRF microscopy, followed by *post-hoc*  
1330 immunolabeling for Kv2.1, RyRs, and MAP2. Arrows indicate ROIs where spontaneous  $\text{Ca}^{2+}$  signals  
1331 were detected; dashed circles indicate approximate regions where immunolabeling for Kv2.1 and RyRs  
1332 was detectable (scale bar: 10  $\mu\text{m}$ ). (G) Kymograph showing the localized  $\text{Ca}^{2+}$  release events detected at  
1333 ROIs depicted in F.

1334

1335 **Figure 4. Spontaneous  $\text{Ca}^{2+}$  signals at Kv2.1-associated EPJs are produced by RyR- and LTCC-**  
1336 **mediated CICR.** (A) Representative GCaMP3-Kv2.1 fluorescence traces from CHNs treated with  
1337 pharmacological probes of CICR. Different colors indicate spatially distinct ROIs within the same  
1338 neuron. Dashed line indicates typical threshold for localized  $\text{Ca}^{2+}$  signals as opposed to the larger  
1339 amplitude, synchronized global  $\text{Ca}^{2+}$  transients. (B) Summary data of the amplitude and frequency of all  
1340 sparks recorded from CHNs treated with pharmacological probes of CICR. Each point corresponds to a  
1341 single cell (\*\* $p=0.0013$  vs. control; \*\*\*\* $p<0.0001$  vs. control; { } : no  $\text{Ca}^{2+}$  sparks detected; One-way  
1342 ANOVA followed by Dunnett's test). (C) Image of rat CHN transfected with GCaMP3-Kv2.1 and treated  
1343 with caffeine, followed by *post-hoc* immunolabeling for RyRs (scale bar: 10  $\mu\text{m}$ ). Numbered arrows  
1344 indicate ROIs where localized  $\text{Ca}^{2+}$  signals were detected (ROIs 1-3) or not detected (ROI 4). ROI  
1345 fluorescence traces are shown in lower panel; note lack of spontaneous  $\text{Ca}^{2+}$  signals at ROI 4 despite its  
1346 proximity to ROI 3, which displays prominent spontaneous  $\text{Ca}^{2+}$  release. (D) As in panel A, except CHN  
1347 was treated with 500 nM Bay K8644 to induce spontaneous  $\text{Ca}^{2+}$  signals (scale bar: 10  $\mu\text{m}$ ). (E) Plot of  
1348 individual RyR cluster size (determined from *post-hoc* immunolabeling) versus its spark amplitude (left  
1349 panel) or frequency (right panel) reported by GCaMP3-Kv2.1 fluorescence in control (black symbols) or



1350 Bay K8644-treated (red symbols) cells. Each point corresponds to an individual RyR cluster ( $n$ =data from  
1351 4 cells [control] or 5 cells [Bay K8644]).

1352

1353 **Figure 5. Kv2.1 expression increases the frequency of LTCC- and RyR-mediated sparks**

1354 **reconstituted in HEK293T cells.** (A) TIRF image of a HEK293T cell expressing Cav1.2, RyR2,  
1355 STAC1, and the LTCC auxiliary subunits  $\beta 3$  and  $\alpha 2\delta 1$ , and loaded with Cal-590 AM. (B-C) TIRF images  
1356 of HEK293T cells additionally coexpressing Kv2.1. Dashed line indicates ROI depicted in corresponding  
1357 kymographs (scale bar in panels A-C: 10  $\mu\text{m}$ ). (D-F) Kymograph showing the localized  $\text{Ca}^{2+}$  release  
1358 events detected in the ROI on the cell in panels A-C, respectively. In (F), 100  $\mu\text{M}$  tetracaine was added at  
1359 the indicated time point. (G) Kymograph showing the localized  $\text{Ca}^{2+}$  release events detected in a cell  
1360 treated with 500 nM Bay K8644 at the indicated time point. (H) Illustration of the membrane topology of  
1361 a single Kv2.1  $\alpha$  subunit depicting the locations of the P404W and S586A point mutations. (I) Summary  
1362 data of the amplitude, frequency and spatial spread (width) of all sparks recorded from HEK293T cells  
1363 expressing Cav1.2, RyR2, and auxiliary subunits, without (control) or with addition of the indicated  
1364 Kv2.1 isoforms. Each point corresponds to a single cell (width: \* $p=0.048$ ; amplitude: \*\* $p<0.0001$ ,  
1365 \* $p=0.039$ ; frequency: # $p=0.053$ , \*\* $p=0.033$ ; One-way ANOVA followed by Dunnett's *post-hoc* test vs.  
1366 control).

1367

1368 **Figure 6. Cav1.2 channel activity is increased by coexpression with Kv2.1<sub>P404W</sub>.** (A) Representative

1369  $\text{Ca}^{2+}$  current trace families recorded from HEK293T cells transfected with Cav1.2-GFP and auxiliary  
1370 subunits Cav $\beta 3$  and Cav $\alpha 2\delta 1$ , without (+ pcDNA3 empty vector) with cotransfection of DsRed-  
1371 Kv2.1<sub>P404W</sub>. For panels D-F, data are from cells without (+ pcDNA3 empty vector, in black) or with  
1372 coexpression of Kv2.1<sub>P404W</sub> (in red). (B) Normalized current-voltage ( $I$ - $V$ ) relationship of whole-cell  $I_{\text{Ca}}$   
1373 recorded from  $n=17$  (Cav1.2 + pcDNA3) and  $n=10$  (Cav1.2 + Kv2.1<sub>P404W</sub>) cells. (C) Voltage-dependence  
1374 of whole cell Cav1.2 conductance  $G/G_{\text{max}}$  and steady-state inactivation  $I/I_{\text{max}}$ . For the conductance-voltage  
1375 relationships, the half-maximal activation voltage  $V_{1/2}=-8.9\pm 0.8$  [pcDNA3] vs.  $-13.9\pm 1.6$  [+Kv2.1<sub>P404W</sub>]

1376 mV,  $p=0.0045$ ; slope factor  $k=6.9\pm 0.3$  [pcDNA3] vs.  $4.5\pm 0.7$  [+Kv2.1<sub>P404W</sub>],  $p=0.0025$ ; Student's *t*-test.  
1377 (D) Representative nitrendipine-sensitive Cav1.2 gating and tail currents recorded from control  
1378 (pcDNA3) cells and cells coexpressing Kv2.1<sub>P404W</sub>. (E) Quantification of nitrendipine-sensitive Cav1.2  
1379  $Q_{on}$  (left),  $I_{tail}$  (center), and  $Q_{on}$  vs.  $I_{tail}$  (right). Each point corresponds to a single cell ( $*p=0.019$ , Student's  
1380 *t*-test). (F) Average Rhod-2 fluorescence intensity measurements obtained from cells held at different  
1381 membrane potentials during voltage clamp experiments ( $n=4$  cells per condition). (G) Average  
1382 fluorescence intensity measurements from Fluo4-loaded HEK293T cells transfected with Cav1.2,  
1383 auxiliary subunits Cav $\beta$ 3 and Cava $\alpha$ 2 $\delta$ , without (+ pcDNA3 empty vector, in black) or with Cotransfection  
1384 of Kv2.1<sub>WT</sub> (in blue) or Kv2.1<sub>P404W</sub> (in red). Ca<sup>2+</sup> influx was stimulated by depolarization with high  
1385 extracellular K<sup>+</sup> (45 mM) as indicated on the graph. (H) Average peak fluorescence values obtained  
1386 during high-K<sup>+</sup> depolarization of HEK293T cells expressing Cav1.2 and Kv2.1<sub>WT</sub> or Kv2.1<sub>P404W</sub> as in G.  
1387 Each point corresponds to a single cell. Bars are mean  $\pm$  SD (\*\* $p<0.0001$ ,  $*p=0.0047$  versus control;  
1388 Student's *t*-test).  
1389  
1390 **Figure 7. LTCC activity is reduced in Kv2.1 KO hippocampal neurons.** (A) Representative Ba<sup>2+</sup>  
1391 current traces recorded from WT (left) and Kv2.1 KO CHNs (right) recorded at +10 mV in vehicle or in  
1392 the presence of the LTCC inhibitor nimodipine (10  $\mu$ M). (B) Representative raw tail current records from  
1393 a WT (left) and Kv2.1 KO (right) CHN induced by a step to -70 mV from a 10 mV prepulse, recorded in  
1394 vehicle or in the presence of 10  $\mu$ M nimodipine. C-F. Comparison of WT (red) and Kv2.1 KO (black)  
1395 CHNs. (C) Maximum tail current amplitudes measured at -70 mV from a 10 mV prepulse. Each point  
1396 represents one cell. (D) As in C but recorded in the presence of 10  $\mu$ M nimodipine. (E) Maximum  
1397 nimodipine-sensitive tail current amplitudes obtained from each cell by subtracting maximum tail current  
1398 amplitudes measured in vehicle from those measured in the presence of nimodipine. (F) Representative  
1399 nimodipine-sensitive LTCC gating and tail currents recorded from WT and Kv2.1 KO CHNs. (G)  
1400 Quantification of nimodipine-sensitive LTCC  $Q_{on}$  (left),  $I_{tail}$  (center), and  $Q_{on}$  vs.  $I_{tail}$  (right) recorded from  
1401 WT and Kv2.1 KO CHNs. Each point corresponds to a single cell ( $*p=0.019$ , Student's *t*-test).

1402

1403

1404 **Figure 8. Increased immunolabeling for Cav1.2 in Kv2.1 KO brain sections, and reduced spark**

1405 **frequency in cultured Kv2.1 KO CHNs.** (A) Column shows exemplar images of the hippocampus

1406 acquired from brain sections of adult WT mice immunolabeled for Kv2.2 (red), Cav1.2 (green) and Kv4.2

1407 (blue) (scale bar: 200  $\mu\text{m}$ ). (B) As in A but acquired from Kv2.1 KO mice. (C) Summary graphs of

1408 normalized mean fluorescence intensity of Kv2.2, Kv4.2, and Cav1.2 immunolabeling from ROIs from

1409 various laminae within CA1 (s.p.: *stratum pyramidale*; s.r.: *stratum radiatum*) and DG (s.g.: stratum

1410 granulosum; mo: molecular layer) in brain sections from adult WT (red) and Kv2.1 KO (black) mice.

1411 Each point corresponds to an individual mouse (Cav1.2 vs. Kv2.2: \* $p=0.0408$ ; Cav1.2 vs. Kv4.2:

1412 \*\* $p=0.0018$ , \*\*\* $p=0.0007$ ). (D) A single optical section image of a WT mouse CHN immunolabeled for

1413 Kv2.1, Cav1.2, and RyRs (scale bar: 10  $\mu\text{m}$ ). (E) As in D but acquired from a Kv2.1 KO mouse CHN. (F)

1414 Representative WT mouse CHN loaded with Cal590 and imaged with TIRF microscopy, followed by

1415 *post-hoc* immunolabeling for RyRs, Kv2.1, and Cav1.2. Arrows indicate ROIs where spontaneous  $\text{Ca}^{2+}$

1416 signals were detected; dashed circles indicate approximate regions where immunolabeling for Kv2.1,

1417 Cav1.2, and RyRs was detectable. Kymograph showing the localized  $\text{Ca}^{2+}$  release events detected at ROIs

1418 are depicted to the right. (G) Summary data of the amplitude, frequency and spatial spread (width) of all

1419 sparks recorded from WT and Kv2.1 KO mouse CHNs. Each point corresponds to a single cell

1420 (\*\* $p=0.0042$  versus WT; Student's *t*-test).

1421

1422 **Figure S1. Cav1.2 spatially associates with Kv2.2 in brain neurons.** (A) Confocal optical section

1423 obtained from the dentate gyrus of a rat brain section immunolabeled for Kv2.2 (red) and Cav1.2 (green).

1424 Nuclei are shown in blue (scale bar: 10  $\mu\text{m}$ ). (B) Confocal optical section obtained from the pyramidal

1425 cell layer of hippocampal area CA1 in a rat brain section immunolabeled for Kv2.2 (red) and Cav1.2

1426 (green). Nuclei are shown in blue.

1427

1428 **Figure S2. Identification of proteins in close spatial proximity to Kv2.1 using immunopurification**  
1429 **and chemical crosslinking-based proteomics.** Schematic detailing experimental workflow for  
1430 immunopurification of proteins in close spatial proximity to Kv2.1 by chemical crosslinking of mouse  
1431 brain homogenates, immunopurification of Kv2.1 and mass spectrometry (LC-MS/MS) based protein  
1432 identification. Diagram below illustrates a model for the molecular architecture of Kv2.1-associated EPJs  
1433 deduced from immunolabeling of neurons and crosslinking-based proteomics (note crosslinks between  
1434 proteins shown in pink are hypothetical).

1435

1436 **Figure S3. Cav1.3s is recruited to Kv2-induced EPJs.** (A) TIRF images of a HEK293T cell  
1437 cotransfected with the short isoform of Cav1.3 (GFP-Cav1.3 (green), BFP-SEC61 $\beta$  (blue) and auxiliary  
1438 subunits Cav $\beta$ 3 and Cav $\alpha$ 2 $\delta$  (not shown). Scalebar is 10  $\mu$ m and holds for all large panels in figure.  
1439 Pseudocolored intensity profiles of GFP-Cav1.3 and BFP-SEC61 $\beta$ , from the boxed area in the merged  
1440 image, are shown to the right of merged image. (scale bar: 2.5  $\mu$ m and holds for all pseudocolored  
1441 intensity profiles in figure). (B) TIRF images of HEK293T cells cotransfected with DsRed-Kv2.1 (red),  
1442 GFP-Cav1.3 (green), BFP-SEC61 $\beta$  (blue) and auxiliary subunits Cav $\beta$ 3 and Cav $\alpha$ 2 $\delta$  (not shown).  
1443 Pseudocolored intensity profiles of DsRed-Kv2.1, GFP-Cav1.3 and BFP-SEC61 $\beta$ , from the boxed area in  
1444 the merged image, are shown to the right of merged image. (C) TIRF images of a HEK293T cell  
1445 cotransfected with DsRed-Kv2.2 (red), GFP-Cav1.3 (green), BFP-SEC61b (blue) and auxiliary subunits  
1446 Cav $\beta$ 3 and Cav $\alpha$ 2 $\delta$  (not shown). Pseudocolored intensity profiles of DsRed-Kv2.2, GFP-Cav1.3 and  
1447 BFP-SEC61 $\beta$  from the boxed area in the merged image, are shown to the right of merged image.

1448

1449 **Figure S4. Kv2.1 increases the frequency of Cav1.3s and RyR-mediated sparks reconstituted in**  
1450 **HEK293T cells.** (A) TIRF image of HEK293T cell expressing the short isoform of Cav1.3 (Cav1.3s),  
1451 RyR2, STAC1, and the LTCC auxiliary subunits  $\beta$ 3 and  $\alpha$ 2 $\delta$ 1, and loaded with Cal-590 AM (scale bar:  
1452 10  $\mu$ m and holds for panels A-C). (B) TIRF images of HEK293T cells additionally coexpressing STAC1.  
1453 (C) TIRF images of HEK293T cells additionally coexpressing STAC1 and Kv2.1. (D-F) Kymographs

1454 showing the localized  $\text{Ca}^{2+}$  release events detected in the ROI on the cell in panels A-C, respectively. (G-  
1455 H) Data from cells expressing Cav1.3, RyR2 and auxiliary subunits without (white bars) or with  
1456 coexpression of Stac1 (blue bars) or Stac1 + Kv2.1 (red bars). (G) Expression of STAC1 reduces the  
1457 duration of Cav1.3s- and RyR2-mediated CICR events reconstituted in HEK293T cells. (\* $p=0.0339$ ;  
1458 \*\* $p=0.0026$ ; ANOVA followed by Dunnett's test). (H) Summary data of the amplitude, frequency, and  
1459 spatial spread (width) of all sparks recorded. Each point corresponds to a single cell (\*\* $p=0.0081$ ;  
1460 \*\*\* $p=0.0001$ ; ANOVA followed by Dunnett's test).

1461

1462 **Figure S5. Cav1.2 channel activity is increased in cells coexpressing Stac1 upon coexpression with**  
1463 **Kv2.1<sub>P404W</sub>.** A-C: Data recorded from HEK293T cells transfected with Cav1.2-GFP and auxiliary  
1464 subunits Cav $\beta$ 3, Cav $\alpha_2\delta_1$ , and STAC1, without (+pCDNA3, in black) or with Kv2.1<sub>P404W</sub> (in red). (A)  
1465 Representative  $\text{Ca}^{2+}$  current traces at +10 mV. (B) Normalized  $I-V$  relationship of whole-cell  $I_{\text{Ca}}$  recorded  
1466 from  $n=8$  (Cav1.2 + pcDNA3) and  $n=9$  (Cav1.2 + Kv2.1<sub>P404W</sub>) cells. (C) Voltage-dependence of whole  
1467 cell Cav1.2 conductance  $G/G_{\text{max}}$ . For the conductance-voltage relationships, the half-maximal activation  
1468 voltage  $V_{1/2}=1.6\pm 2.0$  [pcDNA3] vs.  $-9.5\pm 2.9$  [+Kv2.1<sub>P404W</sub>] mV,  $p=0.0166$ ; slope factor  $k=8.8\pm 1.2$   
1469 [pcDNA3] vs.  $6.1\pm 0.6$  [+Kv2.1<sub>P404W</sub>],  $p=0.0490$ ; Student's  $t$ -test).

1470

1471 **Movie S1. Spontaneous somatic  $\text{Ca}^{2+}$  signals detected at GCaMP3-Kv2.1 clusters in cultured rat**  
1472 **CHNs.** Stack of widefield images of a rat CHN transfected with GCaMP3-Kv2.1 and imaged at 10 Hz.

1473

1474 **Movie S2. Spontaneous somatic  $\text{Ca}^{2+}$  signals detected by TIRF microscopy in cultured rat CHNs**  
1475 **loaded with Cal-590 AM.** Stack of TIRF images of rat CHNs loaded with Cal-590 AM and imaged at 30  
1476 Hz. Regular wave-like signals are a TIRF imaging artifact. Images have been normalized to the first  
1477 image without detectable  $\text{Ca}^{2+}$  signals (*i.e.*,  $F/F_{\text{min}}$ ).

1478

1479 **Movie S3. Caffeine increases the frequency of somatic Ca<sup>2+</sup> sparks in cultured CHNs.** Images of a rat  
1480 CHN transfected with GCaMP3-Kv2.1 acquired at 5 Hz. Neuron is treated with 5 mM caffeine at t=84 s;  
1481 the increased Ca<sup>2+</sup> spark frequency is apparent from t=87s-101s. Images have been normalized to the first  
1482 image without detectable Ca<sup>2+</sup> signals (*i.e.*, F/F<sub>min</sub>).

1483

1484 **Movie S4. Bay K8644 increases the frequency of somatic Ca<sup>2+</sup> sparks in cultured CHNs.** Rat CHN  
1485 transfected with GCaMP3-Kv2.1 and imaged in the presence of 500 nM Bay K8644. Images have been  
1486 normalized to the first image without detectable Ca<sup>2+</sup> signals (*i.e.*, F/F<sub>min</sub>).

1487

1488 **Movie S5. Tetracaine blocks Ca<sup>2+</sup> sparks reconstituted in HEK293T cells.** Stack of TIRF images of a  
1489 single HEK293T cell transfected with RyR2, Cav1.2, and auxiliary subunits and loaded with Cal-590  
1490 AM. 100 μM tetracaine was added at t=7000 ms. Regular wave-like signals are a TIRF imaging artifact.  
1491 Images have been normalized to the first image without detectable Ca<sup>2+</sup> signals (*i.e.*, F/F<sub>min</sub>).

1492

1493

1494

Figure 1

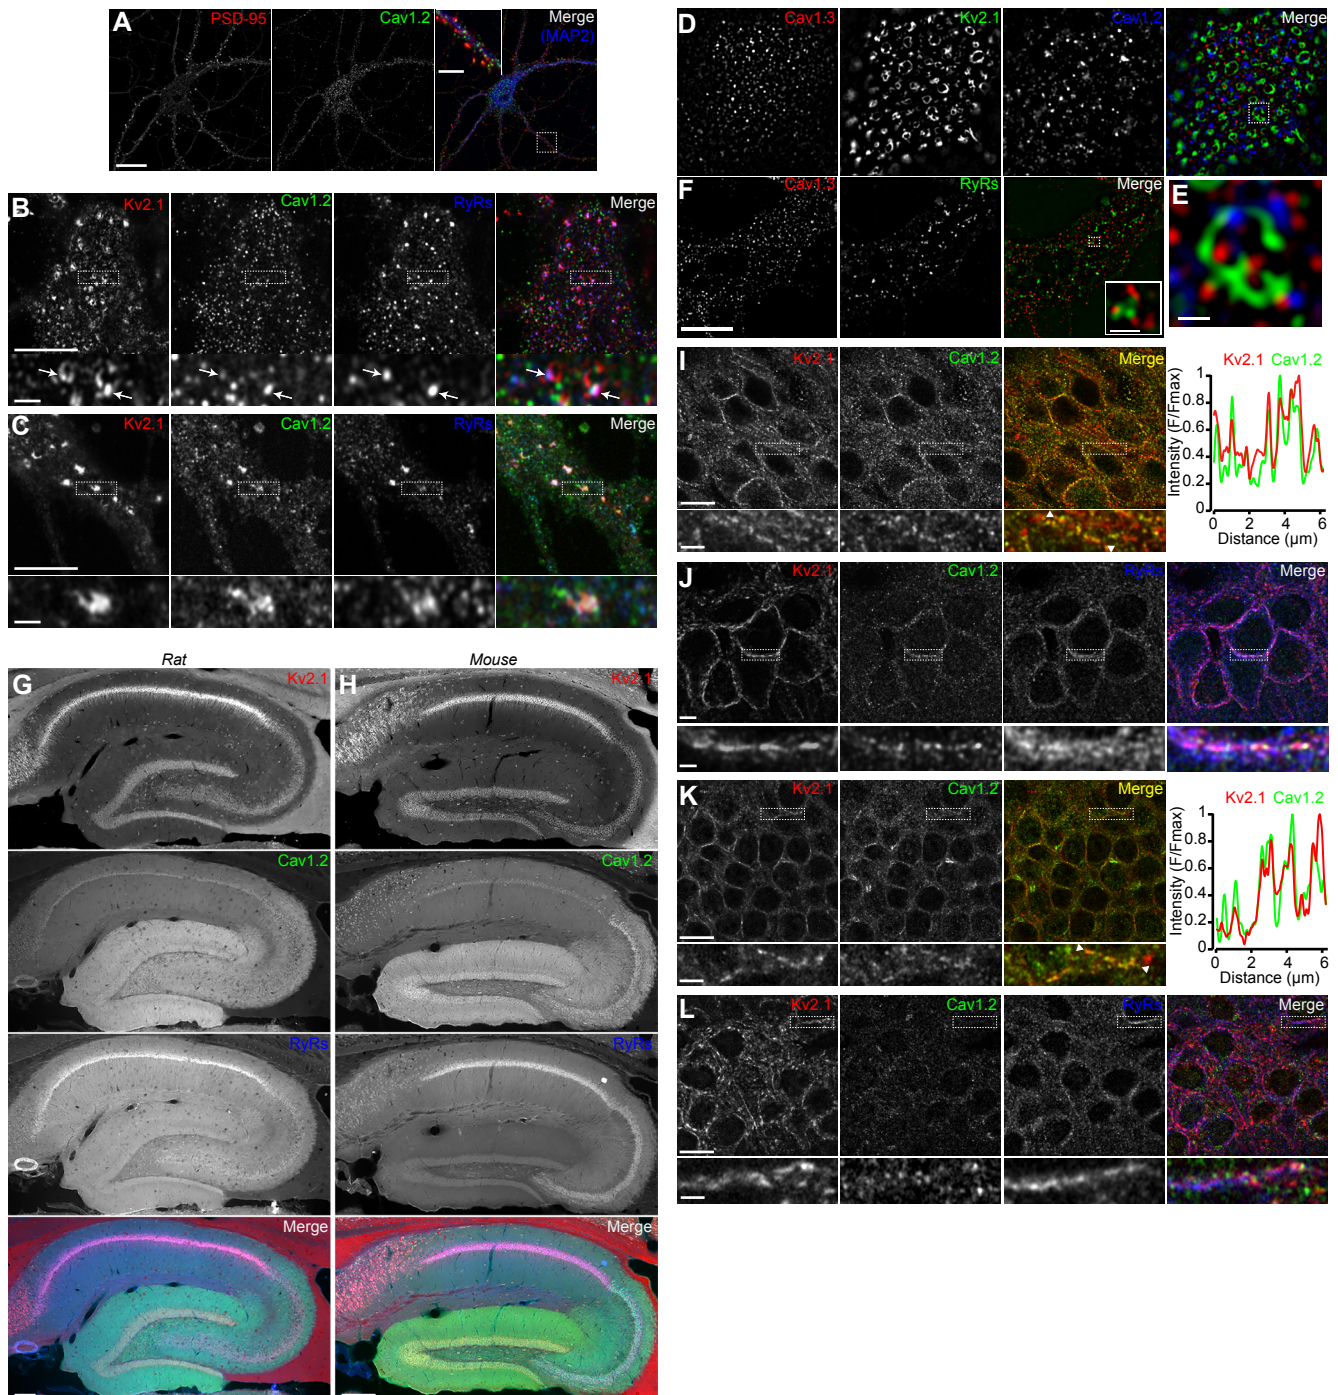

Figure 2

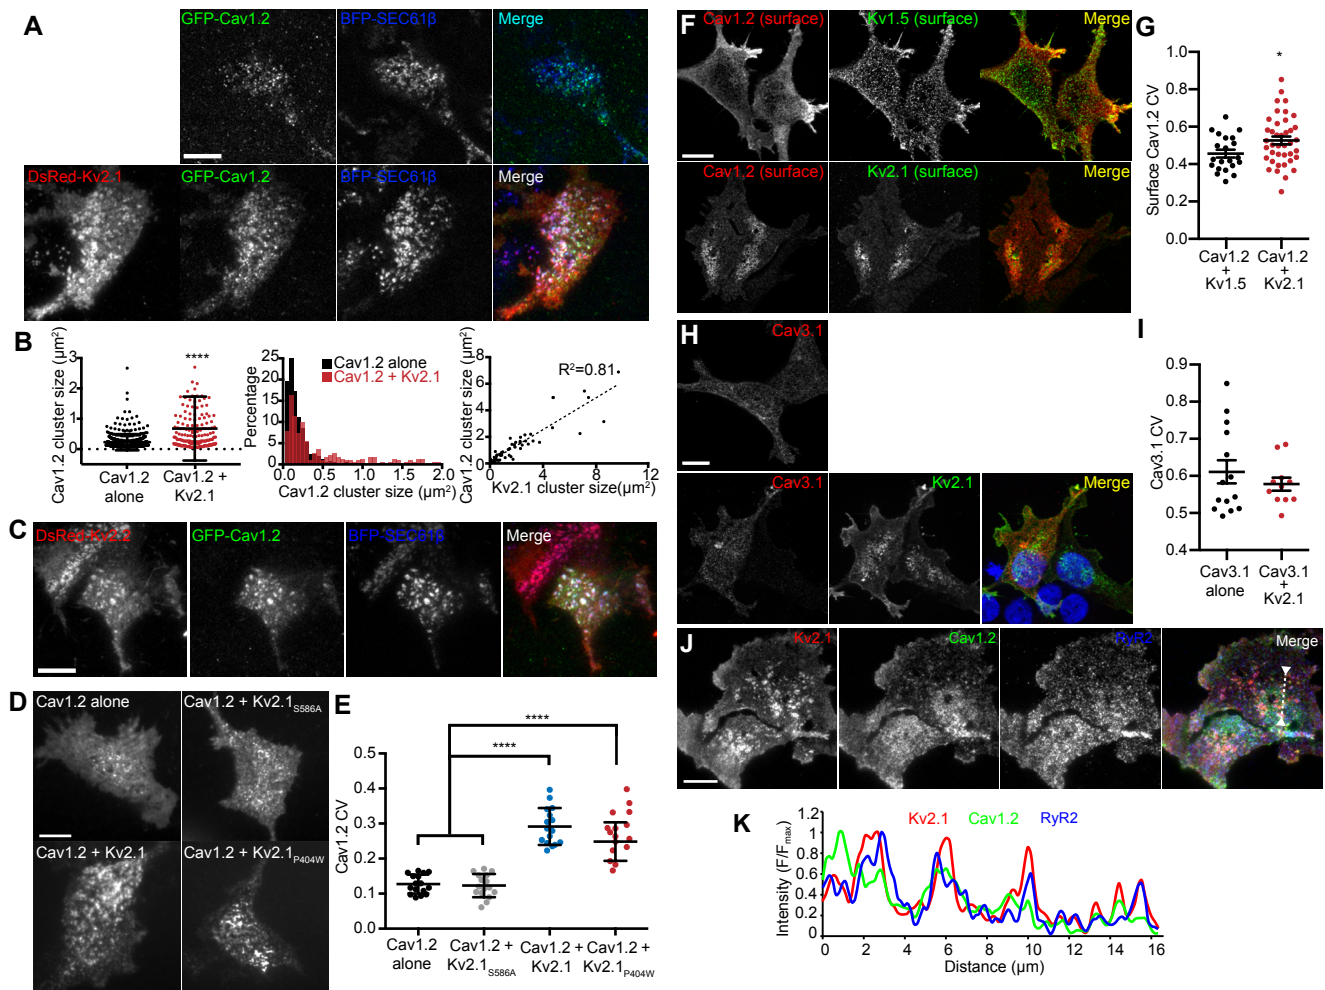



Figure 3

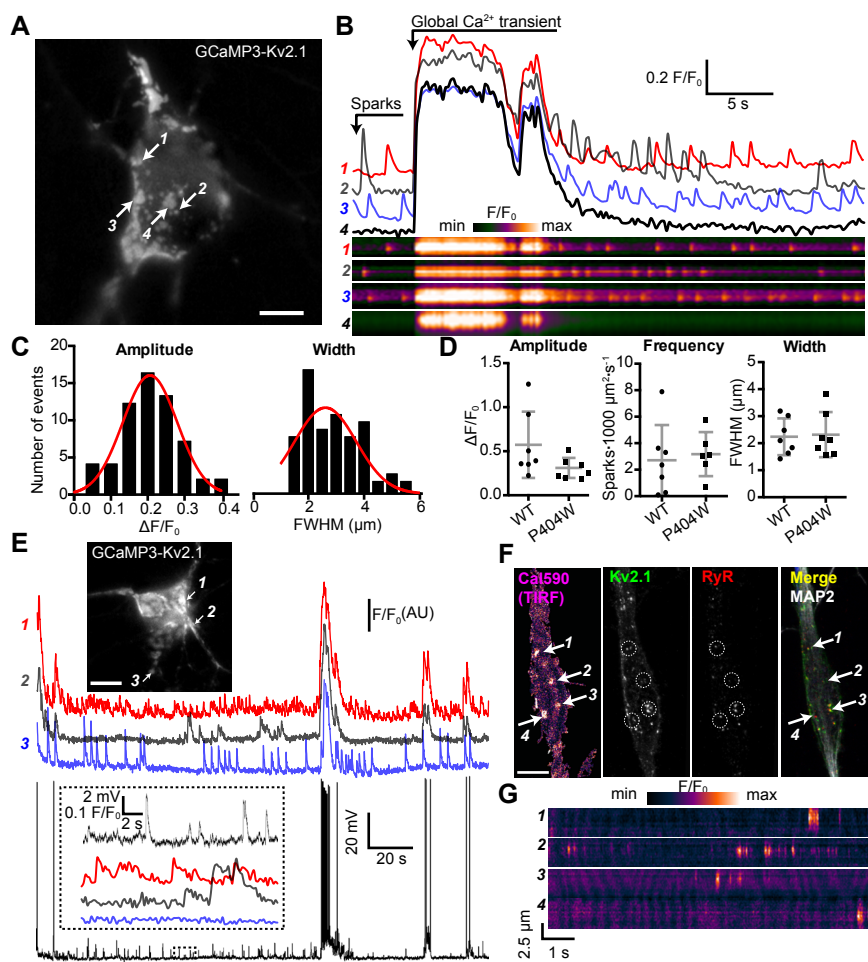

Figure 4

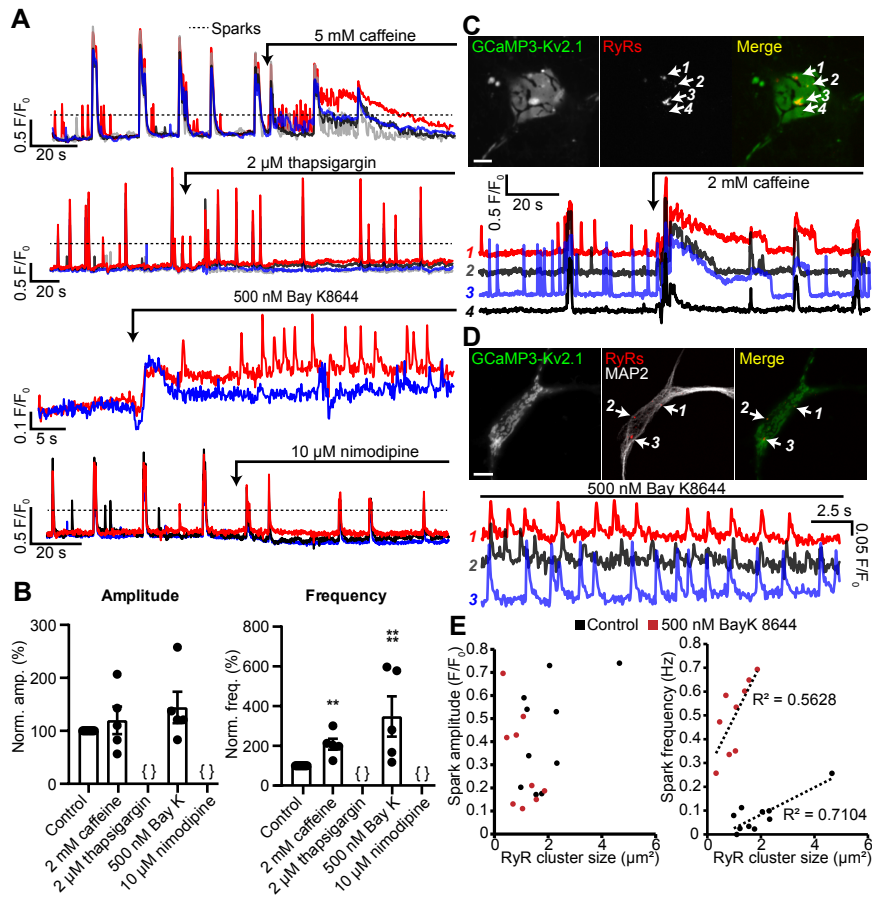

Figure 5

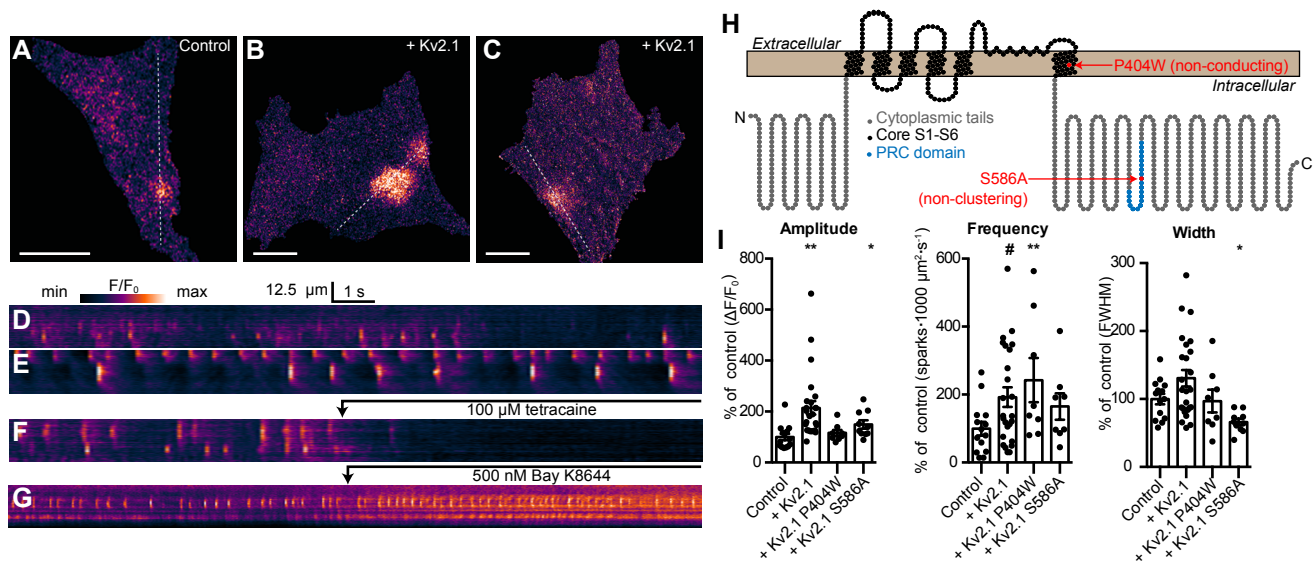

Figure 6

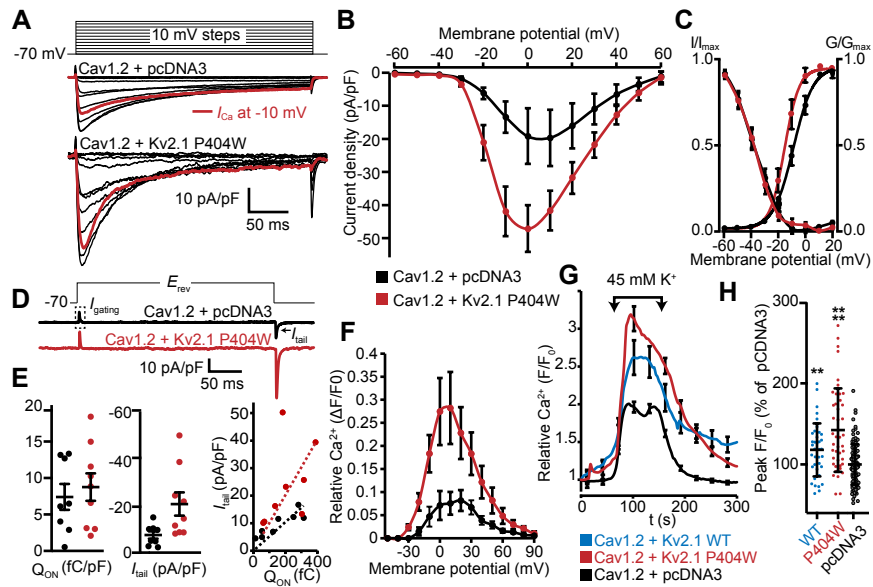

Figure 7

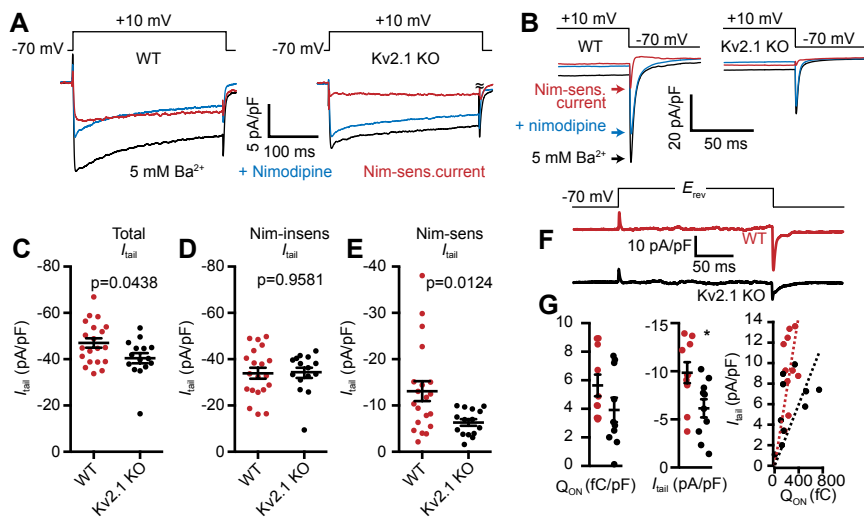

Figure 8

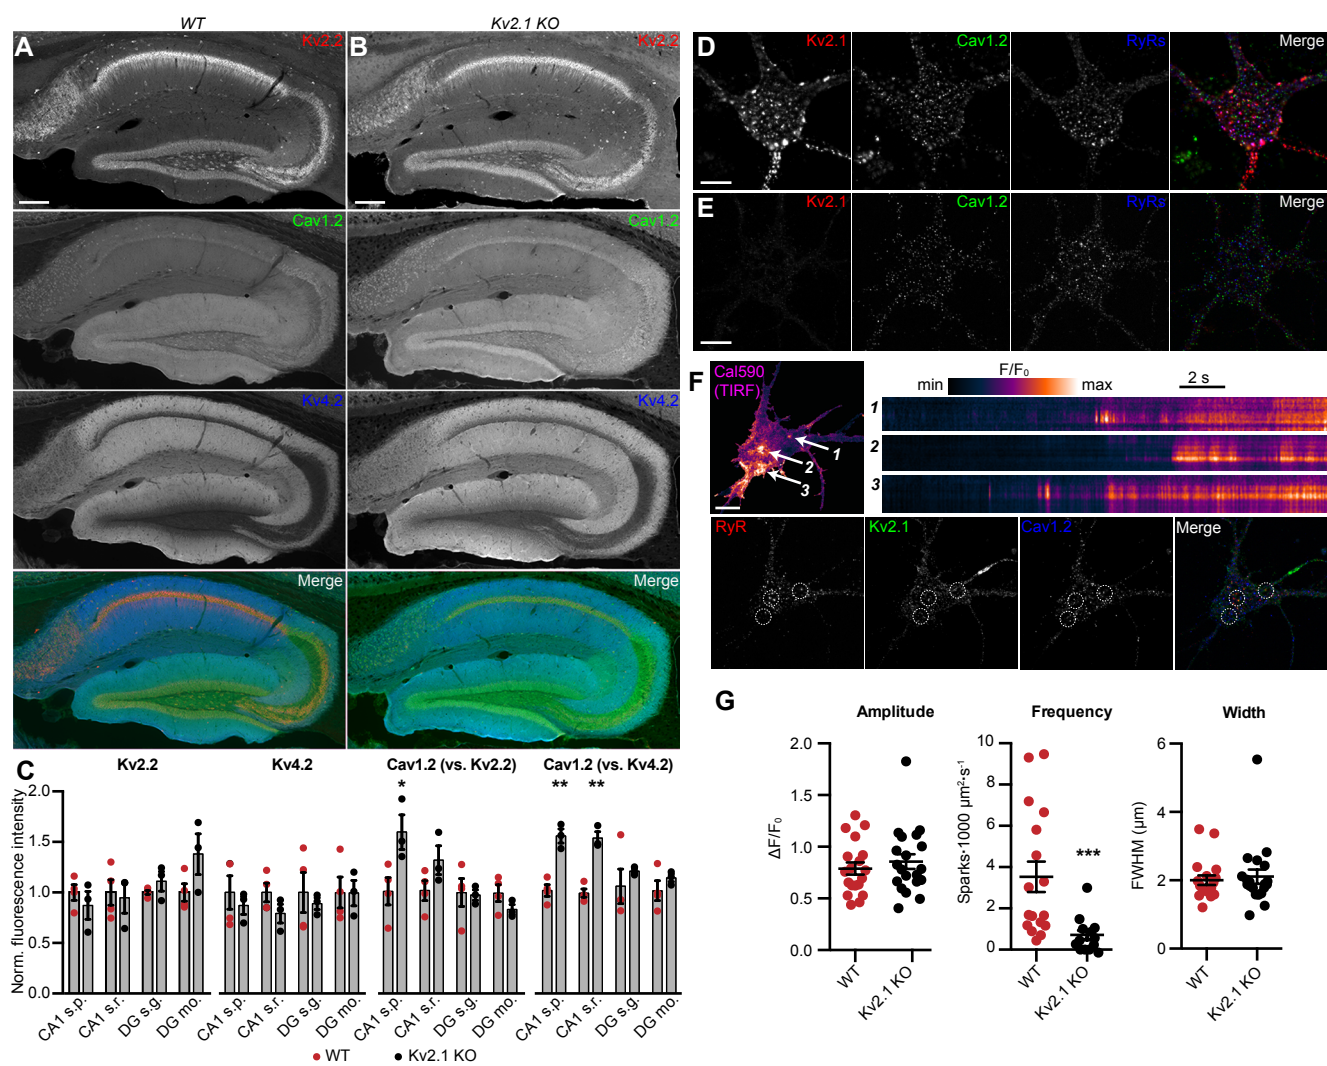

**Figure S1**

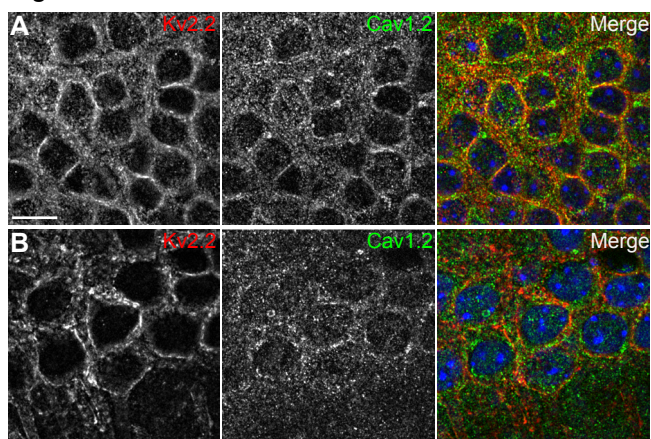

Figure S2

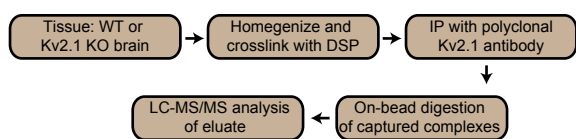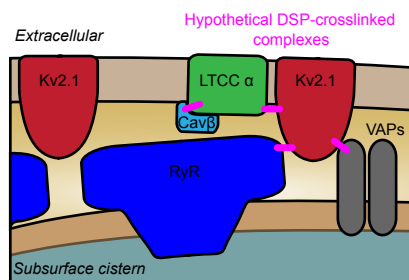



Figure S3

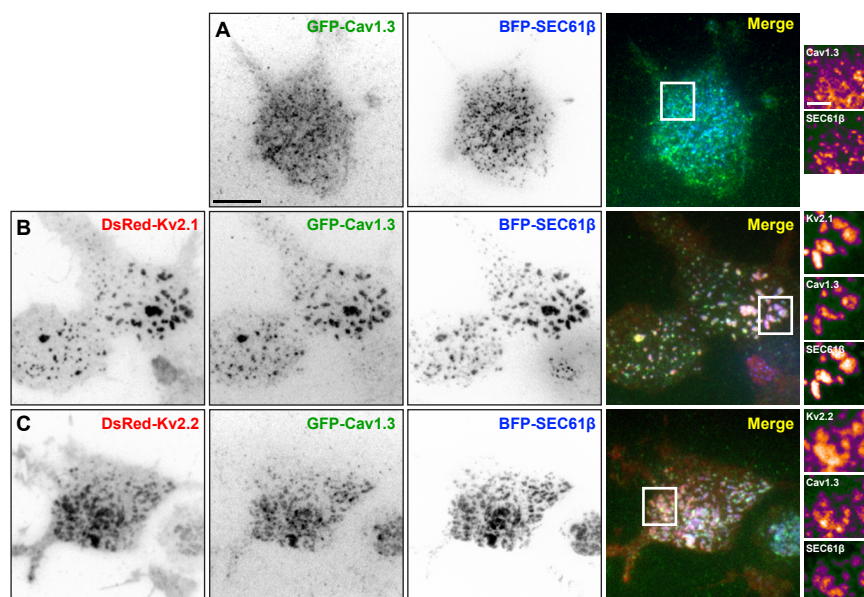

Figure S4

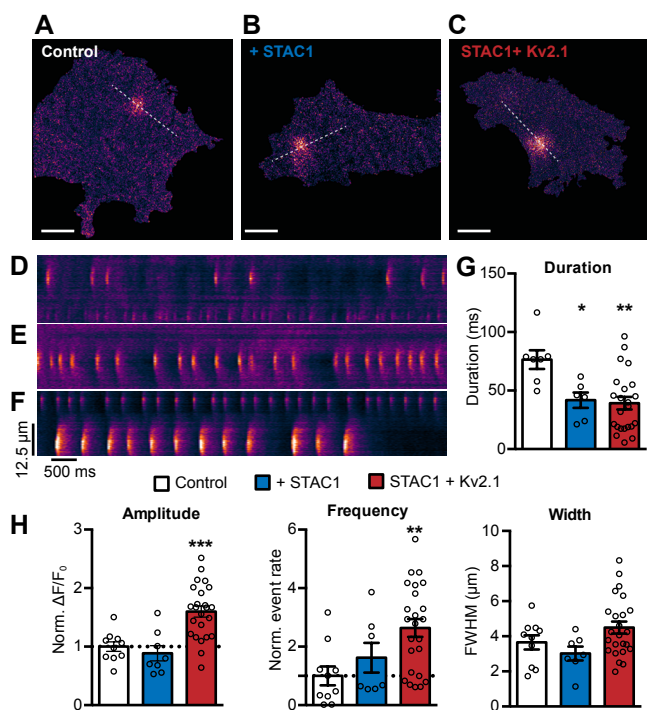

Figure S5

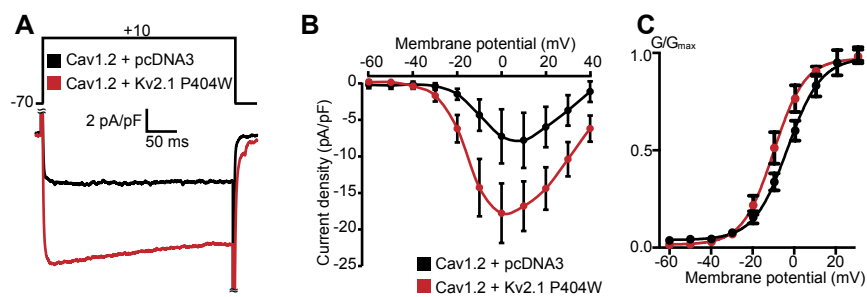

Source: https://www.biorxiv.org/content/10.1101/702514v1.full.pdf
